# Supplementary material
Source: PubMed Central journal article supplement (PMC8448593)
Supplement: NIHMS1735236-supplement-Supplement1.pdf [file NIHMS1735236-supplement-Supplement1.pdf]

## Supplementary Appendix

This appendix has been provided by the authors to give readers additional information about their work.

Supplement to: Landovitz RJ, Donnell D, Clement ME, et al. Cabotegravir for HIV prevention in cisgender men and transgender women. *N Engl J Med* 2021;385:595-608. DOI: [10.1056/NEJMoa2101016](https://doi.org/10.1056/NEJMoa2101016)

## Table of Contents

|                                                                                                                                         |    |
|-----------------------------------------------------------------------------------------------------------------------------------------|----|
| Study Sites and Lead Investigators .....                                                                                                | 2  |
| Supplementary Background .....                                                                                                          | 3  |
| Supplementary Methods.....                                                                                                              | 5  |
| Adherence and Risk Reduction Counseling Approach.....                                                                                   | 5  |
| Site Testing.....                                                                                                                       | 6  |
| Centralized Testing.....                                                                                                                | 6  |
| Statistical Analysis.....                                                                                                               | 7  |
| Supplementary Results.....                                                                                                              | 9  |
| Charter for Syphilis Adjudication.....                                                                                                  | 9  |
| Supplementary Discussion .....                                                                                                          | 14 |
| Acknowledgements.....                                                                                                                   | 16 |
| Figure S1. TFV-DP Concentrations by Adherence Category from a Randomly-Selected Subset of Participants Assigned to the TDF/FTC Arm..... | 24 |
| Figure S2. Per-protocol Kaplan Meier estimates of incident HIV infection .....                                                          | 25 |
| Figure S3. Participants with HIV infection in the TDF/FTC arm: TFV concentrations .....                                                 | 26 |
| Figure S4. Participants with HIV infection in the TDF/FTC arm: TFV-DP concentrations .....                                              | 28 |
| Figure S5. Injection site reactions over time.....                                                                                      | 29 |
| Figure S6. Injection site reactions: timing and duration.....                                                                           | 31 |
| Figure S7 Changes in fasting lipids: Total cholesterol.....                                                                             | 32 |
| Figure S8. Changes in fasting lipids: Triglycerides.....                                                                                | 33 |
| Figure S9. Changes in fasting lipids: Low density lipoprotein (LDL) cholesterol .....                                                   | 34 |
| Figure S10. Changes in fasting lipids: High density lipoprotein (HDL) cholesterol.....                                                  | 35 |
| Figure S11. Changes in fasting glucose.....                                                                                             | 36 |
| Figure S12. Median changes in weight (kg) from baseline (W0) to W105 .....                                                              | 37 |
| Table S1. Reasons for study product discontinuation by step and arm .....                                                               | 38 |
| Table S2. Participant Deaths .....                                                                                                      | 39 |
| Table S3. Study product discontinuation due to injection site reactions (ISRs) - CAB arm.....                                           | 40 |
| Table S4. Baseline sexually transmitted infections .....                                                                                | 41 |
| Table S5. Incident sexually transmitted infections.....                                                                                 | 42 |
| Supplementary Appendix References .....                                                                                                 | 43 |

## Study Sites and Lead Investigators

| Lead Investigator               | Country       | Site                                              |
|---------------------------------|---------------|---------------------------------------------------|
| Suwat Chariyalertsak            | Thailand      | CMU HIV Prevention CRS                            |
| Eileen F. Dunne                 | Thailand      | Silom Community Clinic CRS                        |
| Nittaya Phanuphak               | Thailand      | Thai Red Cross AIDS Research Centre (TRC-ARC) CRS |
| Tran Viet Ha                    | Vietnam       | Yen Hoa Health Clinic CRS                         |
| Omar Sued                       | Argentina     | Fundación Huésped CRS                             |
| Marcelo H. Losso                | Argentina     | Hospital JM Ramos Mejia CRS                       |
| Esper G. Kallas                 | Brazil        | Centro de Pesquisas Clínicas IC-HCFMUSP CRS       |
| José Valdez Ramalho Madruga     | Brazil        | Centro Referencia e Trienamento DST/AIDS CRS      |
| Breno Riegel Santos             | Brazil        | Hospital Nossa Senhora da Conceição CRS           |
| Beatriz Grinsztejn              | Brazil        | IPEC CRS                                          |
| Juan Carlos Hinojosa Boyer      | Peru          | Association Civil Selva Amazonica (ACSA) CRS      |
| Javier Antonio Valencia Huamani | Peru          | Barranco CRS                                      |
| Jorge A. Gallardo-Cartagena     | Peru          | CITBM CRS                                         |
| Pedro Gonzales                  | Peru          | San Miguel CRS                                    |
| Robinson Cabello                | Peru          | Via Libre CRS                                     |
| Keren Middelkoop                | South Africa  | Groote Schuur HIV CRS                             |
| E. Turner Overton               | United States | Alabama CRS                                       |
| Temitope Oyedele                | United States | AYAR at CORE CRS                                  |
| Albert Liu                      | United States | Bridge HIV CRS                                    |
| Jessica Justman                 | United States | Bronx Prevention Research Center CRS              |
| Christopher Hurt                | United States | Chapel Hill CRS                                   |
| Daniel Reirden                  | United States | Children's Hospital Colorado CRS                  |
| Carl Fichtenbaum                | United States | Cincinnati CRS                                    |
| Christopher Hall                | United States | East Bay AIDS Center (EBAC) CRS                   |
| Kenneth Mayer                   | United States | Fenway Health (FH) CRS                            |
| Manya Magnus                    | United States | George Washington University CRS                  |
| Cornelius van Dam               | United States | Greensboro CRS                                    |
| Julie Franks                    | United States | Harlem Prevention Center CRS                      |
| Colleen Kelley                  | United States | Hope Clinic of the Emory Vaccine Center CRS       |
| Roberto C. Arduino              | United States | Houston AIDS Research Team (HART) CRS             |
| Anne Rompalo                    | United States | Johns Hopkins University CRS                      |
| Shobha Swaminathan              | United States | New Jersey Medical School CRS                     |
| Sue Ellen Abdalian              | United States | New Orleans Adolescent Trials Unit CRS            |
| Hong Van Tieu                   | United States | New York Blood Center CRS                         |
| Jose Bazan                      | United States | Ohio State University CRS                         |
| Ian Frank                       | United States | Penn Prevention CRS                               |
| Carlos del Rio                  | United States | Ponce de Leon Center CRS                          |
| Aditya Gaur                     | United States | St. Jude Children's Research Hospital CRS         |
| Raphael J. Landovitz            | United States | UCLA Care Center CRS                              |
| Jesse Clark                     | United States | UCLA Vine Street Clinic CRS                       |
| Richard Novak                   | United States | UIC Project WISH CRS                              |
| Rachel Presti                   | United States | Washington University Therapeutics (WT) CRS       |
| Roy (Trip) Gulick               | United States | Weill Cornell Chelsea CRS                         |

## Supplementary Background

Non-human primate (NHP) models have demonstrated that CAB LA can protect against rectal, vaginal, parenteral, and penile SIV and SHIV challenges.<sup>1-5</sup> In those studies, high levels of protection were seen against repeated exposures when CAB plasma concentrations were above 4-times the protein-adjusted (PA) IC<sub>90</sub> (0.664 µg/mL), and were maintained at drug concentrations above the PA-IC<sub>90</sub> (0.166 µg/mL).

In Phase 2 and 3 HIV treatment studies evaluating long-acting cabotegravir in combination with long-acting rilpivirine for maintenance of virologic suppression among participants who had not previously failed an HIV treatment regimen, virologic failures were infrequent. When virologic failure occurred, in addition to NNRTI-associated mutations, resistance associated mutations were found in the integrase gene of Q148R or N155H with or without accessory mutations including combinations of L74I and G140R. These variably conferred cross resistance to CAB, raltegravir, and elvitegravir, and lower-level resistance to dolutegravir and bictegravir.<sup>6-8</sup> Non-human primate models of acute or primary SHIV infection in which CAB LA was administered during acute viremia generated integrase resistance mutations conferring varying levels of integrase-class resistance as well as decreased replicative capacity.<sup>9</sup> These observations raised the concern that CAB PrEP breakthrough may also be associated with CAB and/or other-integrase resistant virus, and may compromise the efficacy of global first-line integrase-based ART treatment regimens.

For persons living with HIV, ART that contains an integrase inhibitor has been associated with weight gain and increased waist circumference, with changes of greater magnitude seen among women, black patients, and those with lower CD4 and higher HIV RNA prior to starting ART. Some studies have found a mitigating effect of TDF (vs. TAF or ABC) in the ART regimen. While the mechanism of these changes remains elusive in the complex inflammatory milieu of HIV disease, the HIV prevention setting provides a unique opportunity to evaluate weight changes attributable to components of these ART

regimens appropriate for PrEP absent HIV infection. In a Phase 2 randomized comparison of CAB LA and a saline placebo, we found a non-significantly different approximately 1.0 kg weight gain in each study arm over 41 weeks.<sup>10</sup> Similarly, in a Phase 3 randomized double-blind comparison of TAF/FTC and TDF/FTC, a 1.1 kg weight gain was observed compared to -0.1 kg, respectively over 48 weeks.<sup>11</sup>

## **Supplementary Methods**

Detailed methods used for HIV testing and endpoint adjudication are provided in Marzinke et al, JID, 2021<sup>12</sup>. Pre-planned site-based HIV testing and retrospective, centralized HIV testing performed at the HPTN Laboratory Center are described briefly below. Additional information about this testing and information about expanded post-hoc centralized HIV testing are described in Marzinke et al JID 2021<sup>12</sup>.

### Adherence and Risk Reduction Counseling Approach

LifeSteps was initially conceptualized as a single session treatment adherence intervention for persons living with HIV<sup>13,14</sup>, though has since been adapted for individuals who wish to use pre-exposure prophylaxis (PrEP) across several international and domestic contexts<sup>15-17</sup>. LifeSteps is based on principles of cognitive behavioral therapy for health behavior change, with an emphasis on motivational strategies and problem-solving skills, and assumes that there are several steps in which people need to engage in order to be effective consumers of medication, including having a medication taking schedule, getting to appointments, a plan for communication with healthcare providers and managing side effects, and a plan for obtaining refills and storing medications. Individuals then develop a plan and back-up for each of these key behaviors. Participants in HPTN 083 engaged in an initial adherence counseling session that included a review of the study design and the definitions of adherence for both oral study product and injections. Participants also developed plans for each of the key steps in LifeSteps, for both oral study product and injections. Subsequent LifeSteps adherence counseling sessions focused on perceived effectiveness of these plans, and adjustments were made as needed, based on participant preferences and effectiveness. For participants who encountered ongoing challenges to adherence (as assessed by the study interventionist), more in-depth counseling and problem-solving of key barriers to adherence was provided, using a framework based on problem-solving

therapy<sup>18</sup>. Participants were also encouraged to anticipate barriers to adherence that might occur between counseling sessions, and develop plans for those (e.g., travel, change in work schedule). For additional information about LifeSteps and the manual, as recognized by the CDC as an evidenced-based PrEP adherence intervention, please see Psaros et al., 2020<sup>19,20</sup>

### Site Testing

HIV viral load testing was performed for all participants within 14 days prior to enrollment; participants with positive results were not eligible for enrollment. Testing at each study visit included HIV rapid (point-of-care) antibody testing using an assay approved by the United States Food and Drug Administration (US FDA) and instrument-based antigen/antibody testing. HIV infection was confirmed for samples that had reactive or positive results for one or both of these tests. When possible, samples from two different dates were used to confirm HIV infection. In some cases where it was difficult to determine HIV status, peripheral blood mononuclear cell (PBMC) samples were tested in real-time at the HPTN Laboratory Center using an ultra-sensitive HIV DNA test. A centralized committee, firewalled from the study team, reviewed all site HIV test results in real time and provided guidance for additional HIV testing and clinical management.

### Centralized Testing

In all cases where a reactive or positive HIV test was obtained at a study site, additional HIV testing was performed retrospectively at the HPTN Laboratory Center to determine HIV infection status and the timing of HIV infection. The primary algorithm for this testing included an instrument-based antigen/antibody assay, a discriminatory antibody assay, and a qualitative HIV RNA test. Where possible, HIV infection was confirmed using samples collected at two study visits. The pre-specified HIV testing algorithm included “back testing” using the qualitative HIV RNA assay; this testing was performed for the first visit where the site had a reactive or positive test, and at prior visits until a

negative test result was obtained. Samples with reactive qualitative HIV RNA test results at the visits noted and subsequent study visits were tested with a viral load assay. HIV genotyping was performed retrospectively for selected samples that had viral loads >500 copies/mL.

### Statistical Analysis

The HPTN 083 protocol initially specified an interim monitoring plan for efficacy based on crossing the O'Brien-Fleming superiority boundary, a supererogatory criterion in a non-inferiority trial. Beginning in mid-March 2020, COVID-19 related site closures and staffing restrictions created the potential for delays in dispensing of blinded study drug and injections and in timely capture of outcome information in a substantial fraction of sites. Study leadership became concerned about the potential for bias in the evaluation of intervention effect. Because of these concerns about COVID disruption to study execution, the blinded study team proposed that the interim monitoring guidelines for termination be modified to require that evidence of benefit be sufficient to cross a non-inferiority boundary rather than requiring crossing a superiority boundary. This change would enable the study to be terminated as soon as persuasive evidence of efficacy had been achieved (i.e., by crossing the non-inferiority boundary), and decreased the potential risk, through early termination, of relying on evidence that could be impacted by COVID disruptions. This revision was endorsed by the blinded and independent HPTN study monitoring committee, including the sponsor, NIAID. The NIAID DSMB acknowledged the change on April 4, 2020.

At the time of the first interim review, May 14, 2020, the study had crossed the non-inferiority boundary for benefit, and the DSMB recommending stopping the blinded portion of the study. Of note, because the O'Brien-Fleming threshold for stopping at the first interim visit is highly conservative (early stopping requires a p-value less than 0.0001 relative to the non-inferiority hypothesis  $HR=1.23$ ), the final study result ruled out  $HR=1.0$  using a 95% confidence interval (0.18, 0.62) that has proper coverage probability when adjusting for the group sequential testing, providing a definitive superiority result.



Potential participants were excluded from eligibility for HPTN 083 if they reported history of seizures or if they had chronic hepatitis B infection (as evidenced by a positive hepatitis B surface antigen test) or serologic evidence of current or past HCV infection (as evidenced by a reactive hepatitis C antibody). Those with a history of seizures were excluded after a small number of seizures were reported during the CAB development program (both HIV treatment and PrEP), prompting exclusion and enhanced reporting in the Phase 3 studies for PrEP. Hepatotoxicity was considered an event of special interest and closely monitored due to the risk of elevated transaminases observed with other integrase strand transfer inhibitors, and after six participants across the CAB development program developed suspected drug induced liver injury after exposure to oral cabotegravir; no participant receiving CAB LA has developed suspected drug induced liver injury attributable to CAB to-date. Out of an abundance of caution, participants with a history of pre-existing liver disease including steatosis or viral hepatitis were therefore excluded.

## Supplementary Results

### Charter for Syphilis Adjudication

#### **I. Background:**

Historically, syphilis and HIV infection have been closely linked among men who have sex with men (MSM) and transgender women (TGW), with rates of HIV coinfection as high as 70% in those newly diagnosed with syphilis.<sup>1</sup> In addition, multiple analyses have shown that MSM are at greater risk for HIV diagnosis after being diagnosed with early syphilis.<sup>2,3</sup> HIV pre-exposure prophylaxis (PrEP) has helped to dissociate this link: PrEP studies in research and clinical settings have demonstrated drastically reduced incidence of HIV despite high rates of syphilis and other sexually transmitted infections (STIs).<sup>4-6</sup> However, even in the setting of PrEP, syphilis infection continues to be associated with HIV acquisition in HIV negative MSM.<sup>7</sup> High rates of syphilis are anticipated in HPTN 083, and careful surveillance during the study is critical to gain an accurate understanding of syphilis prevalence, and more importantly, syphilis incidence. With broad geographic diversity and expertise in syphilis test result interpretation, HPTN 083's sites have wide heterogeneity in terms of laboratory testing used (VDRL vs. RPR) and diagnostic algorithm employed (traditional vs. reverse sequence). Indications for treatment also differ at the local level, as does the regimen for treatment depending on stage of disease. Thus, a standardized approach to the interpretation of syphilis testing is needed to maintain internal consistency within the study, and ensure that titers are interpreted and generate treatment responses that are harmonized across sites. In order to harmonize reactive test interpretation, treatment paradigms, and disease state (prevalent, incident, serofast without acute disease) coding during the study, the CMC has elected to evaluate all reactive testing results prospectively, beginning at enrollment and throughout study follow-up. In addition, this manner of prospectively monitoring syphilis events will greatly facilitate data cleaning, avoiding the burden of post-hoc interpretation of a large number of tests, and the requirement for significant investment of resources both at the site and protocol team level. However, this process is greatly facilitated by common understanding of the expectations of the site reports as indicated below.

#### **II. Role of the CMC**

Guidelines for the diagnosis and management of syphilis are published every 4-5 years by the US Centers for Disease Control and Prevention (CDC).<sup>8</sup> The CMC follows these guidelines in directing sites when management questions arise. Notably, the CMC also requests that sites obtain outside records when possible to confirm that the current non-treponemal test titer results are correctly contextualized and that management is appropriate. Correspondence with the CMC also ensures that follow-up testing is appropriately scheduled, and that the same EQA-validated laboratory tests are used to interpret serial results. Importantly, the CMC offers guidance as to how to code the reactive syphilis testing results on the corresponding e-CRF. Per protocol, sites must contact the CMC whenever reactive syphilis results are received.

It should be noted that in the interest of assuring that all prevalent disease has been adequately treated at study entry, in order to best identify incident disease during study conduct, decisions regarding treatment will be intentionally conservative, erring on the side of possible over treatment at study entry when clinical scenarios are unclear based on missing or unobtainable clinical and laboratory details of prior disease, titers, testing, and/or treatment.

### III. Objective:

The purpose of this document is to document the decision-making process of the Clinical Management Committee (CMC) of reactive syphilis testing in HPTN 083.

### IV. Clinical Scenarios:

#### A. Pre-existing syphilis – reactive testing at Visit 2.0/W0/study entry:

##### **#1: Newly diagnosed (prevalent) syphilis at study entry – the ppt has no prior history of syphilis diagnosis or treatment, or prior testing has been non-reactive**

Ex of lab results: Reactive non-treponemal (RPR or VDRL) and reactive treponemal testing

Documentation: Pre-existing/prevalent syphilis

Treatment: For early vs late disease depending on time frame, per CDC guidelines

Follow-up: Three months (W17)

##### **#2: Newly diagnosed (prevalent) syphilis at study entry – the ppt has no prior history of syphilis diagnosis or treatment, or prior testing has been non-reactive**

Ex of lab results: Non-reactive non-treponemal (RPR or VDRL) and reactive treponemal testing

Documentation: Pre-existing/prevalent syphilis

Treatment: For early vs late disease depending on time frame, per CDC guidelines

Follow-up: Per Schedule of Evaluations (SOE)

##### **#3: Newly diagnosed syphilis (prevalent) at study entry—the ppt has no prior history of syphilis diagnosis or treatment, or prior testing has been non-reactive**

Ex of lab results: Reactive non-treponemal (RPR or VDRL) and non-reactive treponemal testing\*

Documentation: Pre-existing/prevalent syphilis upon enrollment

Treatment: If RPR or VDRL titer is  $\geq 1:2$  then treat for early vs late disease depending on time frame, per CDC guidelines. For 1:1 titer non-treponemal results, false positive testing is more likely, and treatment is not obligated.

Follow-up: three months (W17)

*\*In some settings this combination would be considered false positive testing; however, because of the pre-test probability of syphilis in the HPTN 083 population, and a desire to err on the side of assurance that study-entry prevalent disease has been appropriately treated so as to best identify on-study incident cases (see above), the CMC recommends treatment in these scenarios.*

##### **#4: Prior diagnosis of syphilis noted at study entry – the ppt has a prior history of syphilis diagnosis and treatment**

Ex of lab results: Reactive non-treponemal (RPR or VDRL) and reactive treponemal testing. In this case, prior records with titers would be needed to confirm adequate treatment response, defined as a 4-fold reduction (that is, by two dilutions, e.g., from 1:64 to 1:16 or from 1:8 to 1:2) in pre-treatment titer.<sup>§</sup>

Documentation: Pre-existing/treated syphilis.

Treatment: None.

**#3: Newly diagnosed syphilis at follow-up, ppt is asymptomatic, and titers are performed at an outside facility**

Ex of lab results: Reactive non-treponemal (RPR or VDRL) and reactive treponemal testing.

Non-treponemal titers are newly reactive, or have increased by at least 4-fold or not diminished from prior titer values by at least 4-fold in response to treatment.

Documentation: Interim visit for the date of the outside facility visit, and incident syphilis on the STI eCRF and AE forms, logged for the date of the outside facility visit.

Treatment: For early syphilis per CDC guidelines

Follow-up: Repeat titers in 3 months, or per SOE, whichever comes first.

**#4: Newly diagnosed syphilis at follow-up, ppt has symptoms of primary or secondary syphilis, and testing is performed at an outside facility**

Ex of lab results: Most often, reactive non-treponemal (RPR or VDRL) and reactive treponemal testing. In some cases of primary syphilis (e.g. presentation with chancre), false-negative testing may occur.

Documentation: Interim visit for the date of the outside facility visit, and incident syphilis on the STI eCRF and AE forms, logged for the date of the outside facility visit.

Treatment: For early syphilis

Follow-up: Repeat titers in 3 months, or per SOE, whichever comes first.

**C. Follow-up reporting (performed at three months intervals after initial diagnosis/treatment, or per SOE)**

**#1: Previously diagnosed syphilis, treated with adequate response**

Ex of lab results: Reactive or non-reactive non-treponemal (RPR or VDRL) and reactive treponemal testing. Non-treponemal titers have declined 4-fold (two dilutions) or more since the time of the initial treatment, or there has been seroreversion (non-treponemal titers now non-reactive).

Documentation: No eCRF/AE form completed

Treatment: None

Follow-up: Per SOE

**#2: Previously diagnosed syphilis, treated with inadequate regimen or inadequate response**

Ex of lab results: Reactive non-treponemal testing (RPR or VDRL) and reactive treponemal testing. Non-treponemal titer has increased or failed to decline 4-fold.

Documentation: Prevalent syphilis if considered ongoing from study entry, incident syphilis for cases in which reinfection is presumed.

Treatment: If more than 3-6 months have passed since the initial treatment, retreatment should occur (for late disease) and CSF evaluation should be considered. If less than 3 months have passed since initial treatment, then ppt would still be followed with titers for adequate response (unless re-exposure/reinfection is considered more likely, then retreatment would be requested).

Follow-up: Three months or per SOE, whichever comes first.



Follow-up: Per SOE

*§If prior records of titers cannot be obtained, but the titer upon study entry is low level (1:8 or less), this can be considered a serofast response if the site is able to document prior treatment or the ppt clearly remembers treatment history. However, in the setting of higher titers, reinfection is considered more likely and retreatment is recommended (see above approach description in scenarios that are unclear).*

**#5: Prior diagnosis of syphilis noted at study entry, treated with inadequate regimen or inadequate response**

Ex of lab results: Reactive non-treponemal testing (RPR or VDRL) and reactive treponemal testing. Non-treponemal titer has increased or failed to decline 4-fold.

Documentation: Pre-existing/prevalent syphilis upon enrollment

Treatment: If more than 3-6 months have passed since the initial treatment, retreatment should occur (for late disease) and CSF evaluation should be considered. If less than 3 months have passed since initial treatment, then ppt would still be followed with titers for adequate response (unless re-exposure/reinfection is considered more likely, then retreatment would be requested).

Follow-up: Three months (W17).

**#6: Prior diagnosis of syphilis noted at study entry – the ppt has a prior history of syphilis diagnosis and treatment**

Ex of lab results: Non-reactive non-treponemal (RPR or VDRL) and reactive treponemal testing. Prior records would still be requested to confirm previous treatment history, if available.

Documentation: Pre-existing/treated syphilis

Treatment: None

Follow-up: Per SOE

**B. Incident syphilis:**

**#1: Newly diagnosed syphilis at follow-up, ppt is asymptomatic and testing is done per SOE**

Ex of lab results: Reactive non-treponemal (RPR or VDRL) and reactive treponemal testing. Non-treponemal titers are newly reactive, or have increased by 4-fold or not diminished from prior titer values by 4-fold after treatment.

Documentation: Incident syphilis on the STI eCRF and AE forms

Treatment: For early syphilis per CDC guidelines

Follow-up: Repeat titers in 3 months

**#2: Newly diagnosed syphilis at follow-up, ppt has symptoms of primary or secondary syphilis**

Ex of lab results: Most often, reactive non-treponemal (RPR or VDRL) and reactive treponemal testing. In some cases of primary syphilis (e.g., presentation with chancre), false-negative testing may occur.

Documentation: Incident syphilis on the STI eCRF and AE forms

Treatment: For early syphilis per CDC guidelines

Follow-up: Repeat titers in 3 months or per SOE, whichever comes first

**#3: Previously diagnosed syphilis, treated with adequate response, then with subsequent increase in titer**

Ex of lab results: As an example, RPR 1:32, then 1:2 after appropriate treatment, then 1:8 or higher on follow-up<sup>#</sup>

Documentation: Incident syphilis

Treatment: For reinfection per CDC guidelines, likely for early syphilis if clear documentation that increase in titer is new. Sites are also to consider the possibility of treatment failure, assess for neurologic symptoms, and consider neurosyphilis with CNS evaluation when appropriate.

Follow-up: Three months or per SOE, whichever comes first.

<sup>#</sup>In cases of rising titer, when titer is still low-level and less than a four-fold increase from prior (e.g. 1:2 then 1:4), retreatment may not be required if there is no concern for re-exposure. In these cases, retesting within 3 months is requested.

**#4 Previously diagnosed syphilis, treated with adequate response, and titers are performed at an outside facility**

Ex of lab results: Reactive non-treponemal (RPR or VDRL) and reactive treponemal testing, with non-treponemal titer stable or decreasing from prior

Documentation: None required

Treatment: None

Follow-up: Per SOE

**References**

1. Su J, Weinstock H. Epidemiology of co-infection with HIV and syphilis in 34 states, United States—2009. In: proceedings of the 2011 National HIV Prevention Conference. August 2011.
2. Katz DA, Dombrowski JC, Bell TR, Kerani RP, Golden MR. HIV Incidence Among Men Who Have Sex With Men After Diagnosis With Sexually Transmitted Infections. *Sex Transm Dis.* 2016;43(4):249-254. doi:10.1097/OLQ.0000000000000423
3. Pathela P, Braunstein SL, Blank S, Shepard C, Schillinger JA. The high risk of an HIV diagnosis following a diagnosis of syphilis: a population-level analysis of New York City men. *Clin Infect Dis Off Publ Infect Dis Soc Am.* 2015;61(2):281-287. doi:10.1093/cid/civ289
4. Molina J-M, Capitant C, Spire B, et al. On-Demand Preexposure Prophylaxis in Men at High Risk for HIV-1 Infection. *N Engl J Med.* 2015;373(23):2237-2246. doi:10.1056/NEJMoa1506273
5. Liu AY, Cohen SE, Vittinghoff E, et al. Preexposure Prophylaxis for HIV Infection Integrated With Municipal- and Community-Based Sexual Health Services. *JAMA Intern Med.* 2016;176(1):75-84. doi:10.1001/jamainternmed.2015.4683
6. McCormack S, Dunn DT, Desai M, et al. Pre-exposure prophylaxis to prevent the acquisition of HIV-1 infection (PROUD): effectiveness results from the pilot phase of a pragmatic open-label randomised trial. *Lancet Lond Engl.* 2016;387(10013):53-60. doi:10.1016/S0140-6736(15)00056-2
7. Solomon MM, Mayer KH, Glidden DV, et al. Syphilis predicts HIV incidence among men and transgender women who have sex with men in a preexposure prophylaxis trial. *Clin Infect Dis Off Publ Infect Dis Soc Am.* 2014;59(7):1020-1026. doi:10.1093/cid/ciu450
8. Workowski KA, Bolan GA, Centers for Disease Control and Prevention. Sexually transmitted diseases treatment guidelines, 2015. *MMWR Recomm Rep Morb Mortal Wkly Rep Recomm Rep.* 2015;64(RR-03):1-137.

## Supplementary Discussion

The low HIV incidence rate observed in both treatment groups is unlikely to be attributable to absence of exposures capable of transmitting HIV infection. This assertion is supported by high rates of prevalent STIs at baseline (Table S4) and high rates of incident syphilis (16.7 per 100 PY) and rectal gonorrhea (11 per 100 PY) and rectal chlamydia (16.8 per 100 PY) [Table S5]. The DISCOVER trial, comparing daily oral F/TAF to daily oral F/TDF among MSM and TGW similarly found rates of rectal gonorrhea (21.6 and 20.5 per 100 PY respectively) and rectal chlamydia (27.5 and 28.2 per 100 PY respectively), with syphilis incidence rates of 10.5 and 9.2 per 100 PY respectively [FDA CDER Application Package Application number 208215Orig1s012]. Although in some series rectal gonorrhea incidence has been shown to correlate with HIV incidence, and in fact has been proposed as a surrogate marker of counterfactual HIV incidence<sup>21</sup>, increases in ART scale-up have threatened to uncouple these metrics<sup>22</sup>.

The differences in annual weight gain observed between the CAB and TDF/FTC arms is largely driven, as has been seen in DISCOVER<sup>11</sup>, by early weight loss in the TDF/FTC arm. In HPTN 083, subsequent to the first year, annualized weight gain is similar between the two arms at approximately 1 kg per year. Interestingly an analysis of weight changes in the Kaiser Permanente system showed that persons living with HIV on ART (all types) gained 0.22 kg per year compared to 0.09 kg per year for matched HIV-uninfected controls. In contrast the ADVANCE study, a randomized trial of initial ART for HIV found that males experienced approximately a 4.7 kg weight gain over the first 48 weeks on a regimen of TAF/FTC/DTG, compared to approximately 3.0 kg for TDF/FTC/DTG and 0.5 kg for TDF/FTC, EFV.<sup>23</sup>

It is particularly notable that the HPTN 083 study population includes just under 50% of the US enrollment from Black/African American participants, 12.4% of the total population from transgender women, and 67.5% of the total population under age 30 – populations disproportionately affected by

HIV and least likely to benefit from currently available oral PrEP strategies. The consistency of the overall results both in direction and magnitude for these key subpopulations is encouraging that CAB LA has the potential to reduce population-level HIV incidence among these communities.



## **Supplementary Acknowledgements**

### **UNITED STATES SITES**

#### **Alabama CRS (UM1AI069452)**

Gina Deavers, Heather Logan, Catrena Johnson, Tamara James, Anna Moyana, Francine Smith, Michelle Chambers, Deon Powell, Paul Goepfert, Kamellia Safavy, E. Turner Overton

#### **UCLA Care Center CRS (UM1AI069424)**

Raphael J. Landovitz, William Moore, Tiara Yamamoto, Irma Franco-Gonzalez, Judith S. Currier, Jennifer J. Chang, David Goodman-Meza, Alex Iling, Michelle Simek, Aleen Khodabakhshian, Ste'von Afemata, Sonia Salas-James, Christine Jackson, Brooke Rodriguez, Melinda Kuo, Arezou Sadighi-Akha, Mariel Selbovitz, Uyen Kao, Lisa Mark, Matt Mueller, Mitch Belkin, John Cabantac, Christina Shin, Hannah Mansky, Heather Karpf, Ghassan Khoury, Maria Palmer

#### **UCLA Vine Street Clinic CRS (UM1AI069424)**

Steve Shoptaw, Jesse Clark, Michele Vertucci, William Hernandez, Susan Reed, Chris Blades, Schuyler Thomas, Demetria Villanueva, Jonathan Veloz, Sandy MacNicoll, Jennifer Baughman, Jasmin Tavarez, Page Briscole, Christina Shin, Hannah Mansky

#### **East Bay AIDS Center (EBAC) CRS**

Christopher Hall, Michele Tang, Jamie Mandelke, Tricia Smallwood, Matthew Reynolds, Ryan Anson, Jessica Horwitz, Emily Rymland, Alex Stefans, Kimery Leong, Steven Oakes, Tuan Nguyen, Gloria Pang, Myesha Kirk, Alexandra LaCorte

#### **Bridge HIV CRS (UM1AI069496)**

Al Liu, Alfonso Diaz, Allison Phillips, April Garcia, David Samayoa, Delia Molloy, Elaine Chae, Emily Schaeffer, Fiona O'Connell-Gates, Gabriella Green, Garza Asencios, Hyman Scott, Janie Vinson, John McGovern, Jonathan Van Nuys, Josephine Ayankoya, Kate McCay, Kenneth Coleman, Megan Henry, Millan Figueroa, Nicholas Ng, Nicole Walker, Patricia Von Felten, Rafael Gonzalez, Shannelle Nebre, Shadi Houshang, Susan Buchbinder, Theresa Wagner, William Juarez, Elba Overton

#### **Children's Hospital Colorado CRS**

Dan Reirden, Betsy McFarland, Carrie Knowlton, Kim Pierce, Emily Barr, Carrie Chambers, Peaches Schweitzer, Damarcus McGill, Ibrahim Kamara, Ellen Burke, Austin Chavez, Shane Curran-Hays, Jenn Dunn, Jenny Englund, Christiane Furlong, Carrie Glenny, Paul Harding, Erin Hilgier, Alix Jones, Alisa Katai, Kay Kinzie, Myron Levin, Carol Mendrygal, Moises Munoz, Kacey Navarro, Layne Perkins, Sarah Rollo, Tori Rutherford, LaDessa Scheinost, McKenna Snyder, Michelle White-Samuels

#### **George Washington University CRS (UM1AI069503)**

Hana Akselrod, Aimee Desrosiers, Jennifer Eyrich-Ferranti, Kayley Langlands, David Parenti, Afsoon Roberts, Bitana Saintilma, Marc Siegel, Gary Simon, Nicole Swanson, Caroline Thoreson, Chelsea Ware, Daniel Anitsakis, Jeanne Jordan, Madison Lintner, Kaitlyn MacNair, Amanda Nelson, Annalise Schoonmaker, Kelly Unekis, Nicole Dornbush, Robbie Kattappurnam, Arley Hunter, Jessica Mcnube, Ryan Mouton, Cynthia Parker, Lakeisha Queen, Regina Smergalino, Nora Abdel-Gawad, Madhu Balachandran, Cheriko Boone, Aurnell Dright, Alan E. Greenberg, Nikardi Jallah, Alexander King, Carolyn Knoll, Irene Kuo, Taylor Ladson, Matt Levy, Manya Magnus, Vivitha Mani, Sophia Wozny, Hannah Yellin, Melissa Turner, Kayley Langlands

Ponce de Leon Center CRS (UM1AI069418)

Valarie Hunter, Edwin Worthington-Blount, Darian West, Carlos del Rio, Jeffrey Lennox, Rotrease Regan, Valeria Cantos, Nathan Summers, Sara Turbow, Elisa Ignatius, Colleen Kelley, John Gharbin, Karon Gaston, Catherine Abrams, Baderina Offutt, Kathy Traylor, Ossie Williams, Christin Root, Philip Powers, Rondell Jagers, Felecia Wright, Pamela Lankford-Turner, Justin Colwell, Sree Aramgam, Tamera Franks, Tiraje Lester, Taylor Johnson, Sha Yi, Fred Ede, Damien Swearing, Derek Jobe, Chris Foster, Juliet Brown, Nursing and Lab Staff of Georgia Clinical and Translational Science, Alliance (CTSA) at Grady Memorial Hospital

Hope Clinic of the Emory Vaccine Center CRS (UM1AI069418)

Colleen Kelley, Alexis Ahonen, LaShonda Hall, Geoffrey Kamau, Harlan Smith, Rameses Frederick, Christopher Conway-Washington, Nadine Rouphael, Matthew Collins, Sri Edupuganti, Nicole Baker, Alicarmen Alvarez, Sharon Curate-Ingram, Renata Dennis, Monica Godfrey, Pamela Lankford-Turner, Shashi Nagar, Varun Phadke, Amy Sherman, Cynthia Whitney, Katie Al-Haroun, Jean Winter, Monica Godfrey, Tiraje Lester, Sha Yi, Damien Swearing, Fred Ede, Justin Caldwell, Taylor Johnson, Sreelatha Aramgam, Jianguo Xu, Machel Hunt, Ellie Butler

Adolescent and Young Adult Research at the CORE Center (AYAR at CORE)

Tope Oyedele, Sybil Hosek, Kelly Bojan, Rachel Jackson, Ixchell Ortiz-Estes, Julia Lee, Meena Malhotra, Ryan Muench, Antionette McFadden, Dorothy Rego, Hamid Bouiri, Marisol Consignado, Andre Evans, Jason Rippe, Christine Inguglia, Maria Budz

UIC Project WISH CRS

Stephanie P. Martin, Marla Schwarber, Wardrick Nealon, Rich Morrissy, Charlie Peterson, Quintin Cammack, David Moore, Rod Reyes, Richard M. Novak, Samuel Rene, Habiba Sultana

New Orleans Adolescent Trials Unit (NO/ATU) CRS

Sue Ellen Abdalian, Leslie Kozina, Alyne Baker, Brenda Andrews, Chi McKendall-Lewis, Lisa Burnett, Sean P. Sylve, Margarita Silio, Lisa Cunningham, Stephen Karl Gotzkowsky, Hamada Rady, Michelle Washington, Shanker Japa, Sandra Eloby Childress, Jasmine Fournier, Sean Williams, Trina Jeanjacques, Joseph Ricky R George Sr, Corinne Vandagriff, Laniece Thomas

Johns Hopkins University CRS (UM1AI069465)

Anne Rompalo, Ilene Wiggins, Margaret Abaandou, Shamiso Chitambira, Vivian Rexroad, Denise Wright, Nadine Brown, Desiree Nock, Charles Flexner, Kelly Dooley, Rennisse McKinley, Andrea Weiss

Fenway Health CRS (UM1AI069412)

Kenneth Mayer, Marcy Gelman, Douglas Krakower, Jessica Kraft, Taimur Khan, Julian Dormitzer, Rossi Fish, Johnathon Holmes, Sinclair Lao, Gina Cardarelli, Margarita Lewinter, Linda Ng, Ryan Earls, Kelvin Powell, Adrianna Boulton, Patrick MacDonald, Rafael Ruiz-Martinez, Shea Buckley, Janet Dargon, Julia Fleming, Brooke Travis, Ryan Tappin, Christopher Chianese, Z. Rob Moyers, Christopher Mistretta, Brooke Travis, Alison McLoughlin, Natalie Marks, May Navarra

Washington University Therapeutics CRS (UM1AI069439)

Rachel Presti, Andrej Spec, AJ Winingham, Alem Haile, Lisa Kessels, Mike Royal, John Tran, Mike Klebert, Kim Gray, Tina Robinson, Teresa Spitz, Sara Hubert, Anita Afghanzada, Laura Blair, Warren Seyfried, Trudy House, Constance Cafazza

New Jersey Medical School Clinical Research Center CRS (UM1AI069419)

Shobha Swaminathan, Christina Daliani, Jared Khan, Jamir Tuten, Travis Love, Amesika Nyaku, Michelle DallaPiazza, Rondalya DeShields, Christie Lyn Costanza, Eric Asencio, Susana Rivera, Sukhwinder Singh, Dina Meawad, Jennifer Punsal, Valerie Cadorett

Bronx Prevention Research Center CRS (UM1AI069470)

Jessica Justman, Ellen Morrison, Rita Sondengam, Ann Kahn, Rashaunna Redd, Martha Cavallo, Ana Victoria Cruz, Jawindy Swengbe, Marbella Silverio, Maria Rivas

Harlem Prevention Center CRS (UM1AI069470)

Sharon Mannheimer, Jun Avelino Loquere, Julie Franks, Orlando Rosario, John Barazzuol, Cassia Wells, Yael Hirsch-Moverman, Joshua Hinkson, Robert Gamboa, Ibrahima Cisse, Darien Thomas, Joshua Bautista, Insiya Taj, Aprielle Wills, Jaron Cook

New York Blood Center CRS (UM1AI069470)

Hong Van Tieu, Sauda Muhammad, Inja Noh, Jenny Yee-Levin, Maria Veronica Sanchez, Ruth Santos, Kiwan Stewart, Angela Lomax, Tarashon Broomes, Geneva Ortiz, Mahtab Sheikh, Margarita Ashkinazi, Jorge Soler, Jay Loeffel, Jonathan Washington, DaShawn Usher, Eddie Bravo, Gabrielle Figueroa, Vijay Nandi, Stephanie Kung, Breanne Baez, Joie Cooper, Bart Buurman, Elsie Marius, Chantel Fletcher, Rashaad Banks, Ilyas Tezerbaev, Arialdy Chavez, Christina Barron, Kipa Sherpa, Joseph Kim, Jeffrey Li, Victoria Frye, Debbie Lucy, Tasha Vazquez, Nikki Englert, Cynthia Yee, Major Nesby, Beryl Koblin

Weill Cornell Chelsea CRS (UM1AI069419)

Trip Gulick, Grant Ellsworth, Tim Wilkin, Valery Hughes, Shaun Barcavage, Todd Stroberg, Briain Mangano, Wayne Burns, Sophia Alvarez, Genesis Rodriguez, Catherine Jerry, Tiina Ilmet

Chapel Hill CRS (UM1AI069423)

Christopher Hurt, Cindy Gay, David Wohl, Joe Eron, Cheryl Marcus, Susan Pedersen, Noshima Darden-Tabb, Durham Health Department, Lincoln Community Health, Felton T., Correll M., DeAndra B, Gordon H, Brian G., Kenneth F., JT, DePris P., Tania Hossain, Nazneen Howerton, Felicia Barriga Munante, Catherine Kronk, Tracy Eldred, Abigail Riddick, Kalina Grimm, Javacia Jackson, Becky Straub, Miriam Chicurel-Bayard, Matthew Newell, Donna Pittard, Maggie Harman, Maria Stetson, Betelehem Shenbulo, Gabrielle Evans, Alexandra Roos, Brittney Soderman, Linda Manor, Maria Bullis, Amy James Loftis, Nicole Maponga, Bill Wolf, Paul Alabanza, Takesha McMillion, Laura Finerty, Dana Lapple, Janette Goins, Marie Oriol, Grace Tillotson

Greensboro CRS (UM1AI069423)

Cornelius Van Dam, Robert Comer, Kim Epperson, Lisa Dasnoit, Laura Keck, Marlene Allen, Caitlyn Delgado, Danielle Guilbeault, Alison Grimsley, Michelle Porter, Correll McRae, Bridget Thomas, Luwam Debru, Elisha Epperson, Tamika Yarborough, Maria Stetson, Charles Hansen, Dan Ferguson

Cincinnati CRS (UM1AI069501)

Carl Fichtenbaum, Moises Huaman Joo, Jaasiel Chapman, Jenifer Baer, Eva Whitehead, Michelle Saemann, Sarah Trentman, Linda Hinds, D'Vaughn House, Michele O'Neill, Brenda Miller, Elizabeth Costea, Eric Mueller, Anissa Moussa, Geronimo Feria Garzon, Sharon Kohrs, Gabrielle Cook, Sierra Bennett, Marlene Petrie, Lyndsey Armor

Ohio State University CRS (UM1AI069494)

Jose A. Bazan, Susan L. Koletar, Brian Greenfelder, Kathy Watson, Rabia Khan, Deliann Campbell, Jan Clark, Heather Harber, Isaac Navar, David Andrist, Lindsay Summers, Aya Vernon, Andrea Vietti

Penn Prevention CRS (UM1AI069534)

Ian Frank, Deb Dunbar, Jie Ho, Nicole Kordziel, Tameka Matthews, Chris Chianese, Gillain Constantino, Petra Alexander, Dana Brown, Annet Vogel, Dan Mangini, Aerynah Bryant, Richard Tustin III, Nicole Sundo, Laura Schankel, Kate Kearns, Kenneth Rockwell, Michele Wisniewski, Susan Carney, Jason DeWitt, Melanie Furjanic, Nancy Tang, Thomas Han

St. Jude Children's Research Hospital CRS (UM1AI069536)

Aditya Gaur, Patricia Flynn, Katherine Knapp, Nehali Patel, Shelley Ost, Sally DiScenza, Carla London, Ramona Burgess, Tara Brown, Hannah Allen, Mary Dillard, Kim Deluca, Christina Owens, Angela London, Jenny Knych, Susan Carr, Camille Smith, Robbin Christensen, Charles Longserre, Julie Richardson, Kirk Knapp, Andrea Stubbs, DeMarcus Jones, Ayeisha Cole, Susannah Keck, Hattie Stewart, Vijay Paladugo

Houston AIDS Research Team (HART) CRS (UM1AI069503)

Roberto Arduino, Jonatan Gioia, Sofia Lupo, Maria Laura Martinez, Olga Ortiz, Martine Diez, Abdul Gabisi, Celia Fenceroy, Maria Florencia Martins

**ARGENTINA SITES**

Fundación Huésped CRS

Pedro Cahn, Omar Sued, Valeria Fink, Carina Cesar, Patricia Patterson, Inés Figueroa, Luciana Spadaccini, Claudia Frola, María V. Iannantuono, Carolina Pérez, Marcelo Gismondi, Herman Ludvik, Daniela Parera, Sergio Sciannameo, Mirna Gaona, Ana Gun, María R. Nemenman, Natalia Panis, Jonathan García, Lara Fernández, Horacio Beylis, Rocío Lada, Luisina Fernández, Agustina Nuñez, Yamila Martinez, Lara Vladimírsky, Emanuel Fojo, Verónica Viggiano, Fabiana Enjamio, Agustina Arguello, Emanuel Dell Isola, Mariana Pugliese, Inés Aristegui, Mariana Duarte, Solange Fabián, Nadir Cardozo

Hospital General de Agudos JM Ramos Mejía

Marcelo Losso, Laura Moreno Macias, Florencia Crupi, Guillermo Vioria, Patricia Burgoa, Angel Parlante, Samanta Arrigorriaga, Nadia Longo, Cecilia Abela, Valentina Losso, Gonzalo Dieguez Gaviola, Sofia Frenkel, Leonardo Perelis, Norberto Selasco, Stella M. Timpano

**BRAZIL SITES**

Hospital Nossa Senhora da Conceição CRS (UM1AI069424)

Andréa Cauduro de Castro, André Luiz Machado da Silva, Breno Riegel Santos, Chaiane Zucchetti, Consuelo Freitas Perez, Dimas Alexandre Kliemann, Eliete Sampaio Fleck, Elizabeth Silva de Magalhães, Fábria Chiarani Campos, Gabriela Duarte Ramos, Fernanda Kuhn, Henry Carmona Kammler, Kelin Roberta Zabtowski Piovesana, Lisdiê Constante Machado, Magnus Cassio Trindade de Melo, Mara Liane Rieck Silveira, Marcelo Edison Vieira de Almeida, Maria Cristina Chaves Seter, Maria Lourdes Somagal Turella, Mariana Riegel de Pádua Simon Moesch, Marineide Gonçalves de Melo, Mickaela Fischer Silva, Priscila de Lima Pelaez, Rita de Cássia Alves Lira, Roberta Fleck dos Santos, Rui Flôres, Salete Maria Zabtowski, Teresinha Joana Dossin, Vera Lucia de Souza Soares, Julio Barros, Ana Vidal, Raquel Trassante, Sandra Gomes, Thiago Khan, Eduardo Lima, Cleo Silva, Thiago Charme, Julio Barros

Instituto de Pesquisa Clínica Evandro Chagas (IPEC) CRS (UM1AI069476)

Beatriz Grinzstejn, Lara Coelho, Egidio Sampaio, Debora Barreto, Juliana Maia, Leonardo Paiva, Desiree dos Santos, Rodrigo Escada, Sandra Wagner, Lucimar Salgado, Tamiris Baiao, Jéssica Felix, Sandro Nazer, Vladimir Mota, Gisele Hottz, Cleber Magalhães, Kelly Gama, Claudio Junior, Ericka Mascarenhas, Thamara de Sousa, Thiago Torres, Valeria Ribeiro, Luana Marins, Giovanna Costa, Robson Pierre, Cristina Jalil, Eduardo Netto, Daniel Waite, Daniel Bezerra, Josias Freitas, Laylla

Monteiro, Marcos Araujo, Tania Krstic, Tania Brum, Flavia Lessa, Luiz Camacho, Ana Paula Gomes, Natalia Maia

#### Centro de Pesquisas Clínicas IC-HCFMUSP CRS

Esper G. Kallás, Natália Cerqueira, Ricardo Vasconcelos, Zelinda Nakagawa, Leandro Concolato, Maria Candida Dantas, Helena Tomiyama, Karine Silva, Rosangela Silva, Denivalda Araújo, Daniel Bertavello, Claudia Tomiyama, Aline Anjos, Maria Angélica Neves, Issler Moraes, Daniel Barros, Michelle Barboza, Denise Sales, Gislayne Lima, Edson Guedes, Thiago Sabino, Luiz Zanella, Renata Oliveira, Raphaela Fini, Piero Mori, Camila Donini, Fabio Ghilardi, Mary Helen Moraes, Gustavo Rezende, Luana Santos, Anna Silva, Carlos Moreira, Simone Tenore, Elizabeth Pereira, Neivaldo Fiorin, Gabriel Borba, Camila Rodrigues, João Magri, Nailson Virgens, Geovanna Farias, Angelas Freitas, Edmilson Medeiros, Franciso Felix, Bárbara Henriques, Alberto Tomiyama, Marilia Antonio, Carolina Lobo, João Araújo, Maria Pereira, Taynan Rocha, Mariana Sauer, Jaqueline Carvalho, Marcia São Pedro, Athos Souza, Carlota Miranda Paredes, Pedro Henrique Figueiredo, Bruna Moreira, Verônica Silva, Natacha Cerchiari, Rosimeire Zaboto, Júlia Tronco, Ferdinando Menezes, Cristiane Amorin, Marjorie Rapozo, Priscila Souza, Anuradha Barreto

#### Centro de Referência e Treinamento DST/AIDS CRS

José Valdez Ramalho Madruga, Roberta Schiavon Nogueira, Aline Carralás Queiroz de Leão, Álvaro Furtado Costa, Ana Caroline Coutinho Iglecias-, Camila Albuquerque Moraes, Clara Vidaurre Mendes, Érika Maria do Nascimento Kalmar, Fábio Luis Nascimento Nogui, Karina Takesaki Miyaji, Lucas Rocker Ramos, Maria Silvia Biagioni Santos, Maisa Miguel Benette, Patricia Rady Muller, Suzana Toledo da Silva Leme, Aline Barnabé Cano, Maura Regina da Silveira, Priscilla de Lima e Menezes, Ricardo Augusto Braga Castro, Goher Lima Gonzales, Sâmia Silveira Souza Teixeira, Adriana Balduino de Azevedo, Luciana Satriano Baptista de Moura, Fábio Rodrigues da Silva, Herla Ignez G. de Souza, Débora Lopez Teixeira Lopes, Kelly Vieira, Roberta Bocalon, Sandra de Araujo, Rosaria Maria Martinez, Maria das Graças Costa Cavalcante-, Wylliam Magnum Telles Dias, Lorena Henn, Vinicius Francisco da Silva, Valvina Madeira Adão, Dirce Candida de Assis, Elvira Maria Ventura Felipe, Elaine Gaeter Gonzalez Pinto, Mariza Fumiko Nakae, Adriana Claro de Oliveira, Vilciani Borges de Souza, Maria Cristina Silva, Carué Contreiras, Cristiane Sales Amorim, Ana Paula Loch, Luciene da Silva Arrifano, Ana Tercia Nascimento, Gabriela Guizi Pereira, Cintia Dellaqua, Natália Amdi Cesari, Lais Braga Soares, Eduardo Prevelato Athayde Junior, Daniel Gleison Carvalho, Cleuza Santos Lopes, Rosa Blanco Matos, Márcio Bertozzi, Beatriz Zveibil

#### PERU SITES

##### Asociación Civil Selva Amazónica (ACSA) CRS (UM1AI069438)

Martin Casapia, Juan Carlos Hinojosa, Ana Rimachi Quiroz, Lucía Ruiz, Carlos Vela, Tania Flores Metzger, Glendy Chamoli, Dori Pashanaste, Jessica López, Aldo Isla, Brenda Urday, Claudia Ramos, Alejandro Quiroz, Karen Campos, Javier Achong, Nieves del Aguila, Mexi Puerta, Silvia Marin, Mónica Chauca, Ceily Silva, Lilia Pinedo, Rocío Jaramillo, Luisa Mowerg, Patsy Torres, Cristina Vela, Carolina Arredondo, Dennis Vela, Andre Cubas, Gonzalo Grandez, Renato Guedes, Jimmy Panduro, Claudia Rojas, Raul Gonzales, Marco Calixtro, Claudia Vargas, Rocio Angulo, Katherine Lozano, Dacil Angulo, Veronica Araujo, Francisco Ruiz, Luis Bolivar, Roxana Pezo, Libby Diaz, Lucero Rodriguez

##### Barranco CRS (UM1AI069438)

Jorge Sanchez, Javier Lama, Javier Valencia, Rosa Infante, Mey Leon, Ernesto Alayo, Joshua Paz, Akemi Matsuno, Jorge Gallardo, Milagros Matta, Saul Levy, Francesca Cordano, Melany Esteban, Manuel Villaran, Yesika Magallanes, Roxana Vargas, Maria Mamani, Fany Rosas, Rosa Blas, Jessica Alva, Aura Jara, Jose Eleazar, Clery Palacios, Helen Chapa, Dalila Salazar, Edith Muñoz, Areli Deliot, Diego Rojas, Adela Huaman, Martin Llancale, Mirna Garrido, Carlos Caceres, Heydee Diaz, Kevin Cruz, Dayhan Contreras, Miguel Angel Chirre, Kevin Puellas, Felipe Vilcachagua, Pio Huaycho, Egdin

Amias, Arturo Sueldo, Gian Carlo Salazar, Lucho Castro, Rosario Leon, Carmela Ganoza, Cecilia Chang, Lily Ganaha, Ricardo Alfaro, Brenda Mauricio, Carmen Salinas, Maria Del Carmen Suarez, Giovanna Barrios, Nieves Castillo, Consuelo Regalado, Virginia Riojas, Elisabeth Astupina, Yerica Valenzuela, Jose Mejia, Remo Gonza, Sandy Perez, Yorcka Alaria, Alejandra Flores, Raul Inocente, Gladys Cabracancha, Hector Garriazo, Martin Patiño, Aron Trujillo, Karen Villanueva, Tula Quispe, Judith Jajaycucho, Soledad Vargas, Cristina Angeldonis, Gladys Chacon, Rocio Yupanqui, Jakeline Alcazar, Luis Limo, Diana Morales, Valeria Fulqui, Eduardo Ruiz, Peter Brandes

Centro de Investigaciones Tecnologicas, Biomedicas y Medioambientales (CITBM) CRS

Jorge Gallardo-Cartagena, Jorge Sanchez, Fanny Rosas, Carlos Medrano, Karin Sosa, Karla Tafur, Martin Moreno, Pamela Ramirez, Juan Montenegro, Claudia Tirado, Armando Piedra, Julio Yonamine, Akemi Matsuno, Gustavo Grandez, Joshua Paz, Patricia Kaway, María Sanchez, Dora Guarniz, Leslie Arancibia, Anibal Vilca, Aura Jara, Narda Montoya, Raquel Espinoza, David Amiel, Sheimy Abad, Yulios Rodriguez, Viviana Ghiglino, Deisy Sanchez, Carlos Romero, Jonathan Zamora, Diego Torres, Hugo Sanchez, Julio Ortiz, Daniel Alva, David Velasquez, Ivan Gonzales, Miguel Gonzales, Fabricio Sanchez, Yolanda Vidal, Irma Izquierdo, Julissa Juarez, Mishiko Sato, Miguel Morales, Roselena Godos, Jose Calienes, Angelo Motta, Carmen Astuvilca, Claudia Arbañil, Cristina Angeldonis, Diana Morales, Gustavo Calleja, María Carrión, Ricardo Alfaro, Richard Negron, Jose M. Guevara, Andrea Paredes, Magnolia Luque, Lenin Silva, Andrea Bermudez, Rosa Zanabria, Ruller Soto, Chilbernan Callirgos, Lucas Sevilla, Guillermo Cajahuanca, Silvana Garcia, Sandy Perez, Sheyber Lifonzo, Yelitza Carhuaz, Diego Moreno, Paula Tamariz, Jose Mesia, Alys Chavez, Luis Rodriguez, Nancy Salcedo

San Miguel CRS (UM1AI069438)

Lisette Rodríguez Pablo, Cecilia Correa Celi, Milagros Sabaduche Rosillo, Roder Flores Sánchez, Richard Francis Teran Guevara, Manuel Neyra Montaña, John Mac Rae Thays, Martin Lacherre Vargas, Carmen Sanchez Torres, Liliana Vallejos Quinto, Ricardo Fernando Quiroz Céspedes, Diana Durand Pinedo, Karina Tacza Mariño, Diana Rojas Huasasquiche, Bertha Talaverano Gonzales, Pedro Gonzales Saenz, Lady Albornos Aliaga, Hector Javier Salvatierra Flores, Karina Pareja Luna, Diego Quiroz Farfán, Kevin Hiro Callata Encarnación, Esperanza Yuriko Vicente Lozano, Daniela Zegarra Ojeda, Gladys Cabracancha, Gian Carlo Yamir Salazar Chavez, Egdin Amias Macuyama, Yuliana Carlos Girao, Luis Oscar Castro Asencio, Maritza Margot Baca Lazo, Bertha Mercedes Talaverano Gonzales, Maria Gabriela Bullon Dominguez, Kattia Eloisa Montes Rodriguez, Christian Teófanos Rojas Contreras, Juan Steve Riojas Arnao, Martin Isaias Lacherre Vargas, Vanessa Galvez Zeballos, Martin Gutierrez Flores, Manuel Neyra Montaña, Diego Ismael Quiroz Farfan, Carla Josefina Porcile Chavez, Carmela Lucila Gonoza Arenas, Maria Cecilia Chang Ching, Brenda Mauricio Nisshioka, Daniela Del Carmen Zegarra Ojeda, Katherine Milagros Charri Macassi

Via Libre CRS

Aileen Castellares Sotelo, Alberto Florez Prada, Alex Barrantes Requiz, Ana Arroyo Nazario, Anderson Troya Paredes, Angela Madueño Delgado, Carlos Anton Talledo, Cesar Cardenas Aguirre, Cesar Flores Maldonado, Consuelo Tristan Ramirez, Daniel Dextre Zurita, Diego torres Nolasco, Edgar Grados Chagray, Eduardo Cachay Cuizano, Edwin Palomino Alvarez, Enrique Avila Liendo, Enrique Oscategui Ricapa, Felix Echeverria Cuba, Fernando Roman Chingne, Fernando Soto Frebres, Fernando Vilchez Torres, Frankin Amasifuen Fernandez, Geannina Sanchez Valladares, Julianna Estrada Franco, Grecia Geri Romero, Gustavo Grandez Castillo, Gustavo Woll Buse, Hector Menacho Montenegro, Irving Diaz de La Cruz, Jean Patiño Ramos, Jennifer Tolentino Ramirez, Jessica Gutierrez Lazaro, Jose Cardozo Rodrigues, Jose Castro Chuquillanqui, Jose Ipanaque Sandoval, Jose Mendoza Paredes, Jose Vasquez Cerro, Julio Ortiz Guevara, Junior Gonzales Cueto, Karina Espinoza Maza, Karla Suarez Bendezu, Lizzet Martinez Dionisio, Luis Mesias Bracamonte, Luisa Siguas Carhuaricra, Maria del Rosario Fernandez Villanueva, Mario Sinti Ycochea, Martin Ramirez Quijandria, Mirian Huanachea Polanco, Narendar Kumar, Oscar horna Garcia, Pedro Hipolito Quispe, Raul Lama

Pascarella, Renato Bobadilla Leon, Robinson Cabello Chavez, Rocio Perez Gonzalez, Rosemarie Ayarza Escobar, Rudy Huaman Edery, Ruth Delgado Escalante, Sonia Montesinos Calleja, Susan del Pilar Chavez Gomez, Tania Blacido Pascual, Victor Hugo Moquillaza, William Tipiani Ramos, Yaniz Carol Lazo Callupe, Yerica Valenzuela Garcia, Yvett Pinedo Ramirez

#### THAILAND SITES

##### Silom Community Clinic CRS

Eileen F. Dunne, Taweessap Siraprapasiri, Chaiwat Ungsedhapand , Wasin Matsee, Anupong Chitwarakorn, Andrew Hickey, Christie Vu, Benjamaporn Chaipung, Anuwat Sriporn, Chidanan Krasan, Jiriporn Nantavishit, Poomin Nongchang, Jirawat Suksamosorn, Warunee Thienkrua, Chariya Utenpitak, Dararat Worrajittanon, Siriphak Pongthai, Wannee Chonwattana, Santi Winaitham, Wichuda Sukwicha, Somsak Yafant, Rinda Wongbenchaporn, Patnaree Oungprasertgul, Phanurassamee Sittidech

##### Thai Red Cross AIDS Research Centre (TRC-ARC) CRS (UM1AI069418)

Nittaya Phanuphak, Praphan Phanuphak, Kiat Ruxrungham, Nipat Teeratakulpisarn, Pongsakorn Surapuchong, Supanat Thitipatarakorn, Tanat Chinbunchorn, Ashmanie Reshmie Ramautarsing, Siriporn Nonenoy, Napasawan Chinlaertworasiri, Patsadaporn Narawin, Thanyapat Chaya-ananchot, Piranun Hongchookiat, Thunyasuta Prasit, Supawan Promkaewto, Achiraya Chanta, Khanittha Janthawilai, Aphakan Klinsukontakul, Shareefah Hayikateh, Warisa Tathian, Kritima Samitpol, Kittichai Promjantuek, Atipan Phoungphu, Sumitr Tongmuang, Kantanat Kanetrat, Sasiwimol Ubolyam, Apicha Mahanontharit, Theera Dalodom, Anuntaya Uanithirat, Chavalun Ruengpanyathip, Kittima Sakorn, Peeraporn Kaewon, Suwittra Chaemchuen

##### Chiang Mai University (CMU) HIV Prevention CRS (UM1AI069399)

Suwat Chariyalertsak, Natthapol Kosashunhanan, Taweewat Supindham, Nuntisa Chotirosniramit, Patcharaphan Sugandhaveha, Amarporn Rerkasem, Quanhathai Kaewpoowat, Pongpun Saokhieo, Ratchanok Songsupa, Amornrat Yangnoi, Rattanaporn Intarawiwarat, Pimsuda Panyawong, Tharida Chaladtunyakorn, Kachaporn Yosbud, Wareerat Kaewphokha, Thanyarat Wannasopha, Suprisara Noomthongkum, Sobhon Bipodhi, Pachara Dechasakulpan, Warunee Jit-aree, Chiraphorn Kaewkosaba, Piyathida Sroysuwan, Boonlure Pruenglampoo, Umpava Timpan, Nittaya Chuenchop, Sineenart Taejaroenkul

#### VIETNAM SITE

##### Yen Hoa Health Clinic CRS

Vivian Go, Tran Viet Ha, Tran Van Sau, Tran Quoc Hung, Le Minh Giang, Hoang Duc Hanh, Do Thi Thu Ha, Ngo Thi Kim Hoa, Le Thi Thanh, Nguyen Quang Vu, Do Nguyen Thu Trang, Tran Thi Thu Hoai, Luong Thi My Ly, Le Thi Thuc Anh, Nguyen Phuong Loan, Lam Thi Binh, Le Thi Ngoc Anh, Do Thi Ngan, Tran Lan Chi, Nguyen Ngoc Son, Do Thu Thao, Kieu Duy Anh, Le Trung Kien, Le Minh Khoi, Tran Van Tai, Dang Thi Ly Nham, Nguyen Thuy Linh, Nguyen Hai Linh, Nguyen Thi Thu Huong, Pham Thi Huong, Nguyen Thanh Hai, Tran Thi Hoa, Tran Van Huong, Dau Sy Nguyen, Ha Nhu Bach, Do Viet Hiep, Nguyen Bao Ngoc, Vu Ngoc Thang, Nhu Le Kien, Bui Ngoc Dong, Nguyen Xuan Khanh, Tran Tat Dat, Truong Thai Phuong, Vu Van Truong, Bui Tuan Anh, Teerada Sripaipan, Susan Pedersen, Amy James Loftis, Tania Hossain, Becky Straub, Catherine Kronk, Pham Tien Hoa, Chu Viet Anh, An Thanh Ly, Nguyen Ngoc Chiu, Pham Ngoc Hao, Nguyen Minh Dung, Trinh Ngoc Duy, Nguyen Thi Bich Hanh, Nguyen Duy Binh, Do Kim Cuong, Nguyen Quang Tho, Luc Quach Binh Guong, Khuat Duy Nam

#### SOUTH AFRICA SITE

##### Groote Schuur HIV CRS (UM1AI069519)

Keren Middelkoop, Doeriyah Reynolds, Brandon Perumaul, Daniel Ndzuzo, Nehemiah Advance Simango, Monica Vogt, Melanie Maclachlan, Zareena Dhansay, Melina Carr, Phyllisty Smith,

Nomvuselelo, Kalolo, Bianka van der Westhuizen, Yashna Singh, Sibulele Nozewu, Lameze Abrahams, Siyabonga Nombali, Amelia Mfiki, Nobafundi Dondolo, Philosophy Bangira, Siyabonga Mdlalo, Xolani Mvula, Stanley October, Precious Garnett, Peter Chodacki, Nontle Madinga, Catherine Orrell, Vanessa Simkins, Fahkri Williams, Mary Chidanyika, Richard Kaplan, Francois Cilliers, Rochel Jacobs, Nomawethu Ngcukana, Luyanda Sebe, Asanda Tolashe, Sheetal Kassim, Anna Cross

#### ADDITIONAL PARTNERS

##### Gilead Sciences

Rich Clark, Brenda Ng, Richard Haubrich, David Piontkowsky, Cal Cohen, Joel Gallant, Christian Callebaut, Moupali Das, Jared Baeten, Chris Nguyen, Fernando Bognar

##### ViiV Healthcare

Amy Cutrell, Britt Stancil, Susan Ford, Shanker Thiagarajah, Navdeep Thoofer, Beth Austin, John Pottage, Subrina Kaur Baghri



Figure S1. TFV-DP Concentrations by Adherence Category from a Randomly-Selected Subset of Participants Assigned to the TDF/FTC Arm

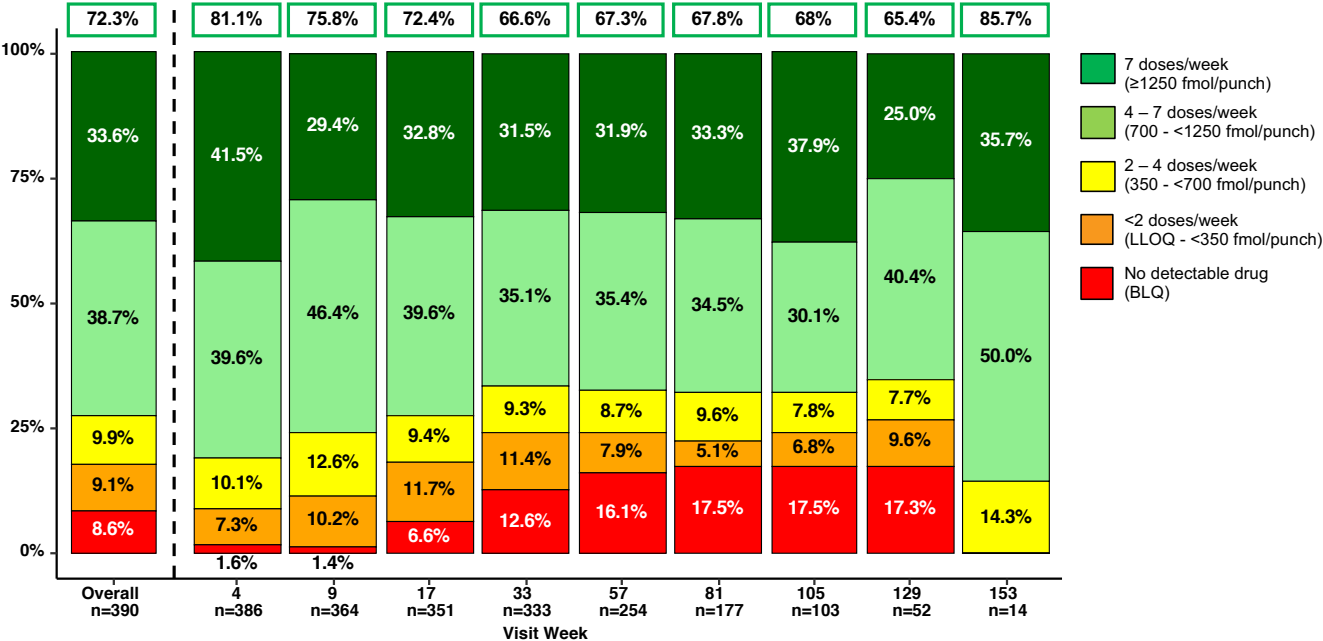

The figure shows the proportion of a randomly-selected subset of TDF/FTC arm participants with intraerythrocytic tenofovir diphosphate (TFV-DP) concentrations measured in dried blood spots in each adherence category; these data represent average dosing over the previous 1-2 months. The green-boxed numbers above each histogram bar represent the aggregate of 4 or more doses per week; this dosing frequency is anticipated to provide high levels of rectal protection against HIV acquisition. Each participant selected for adherence testing may have up to 8 samples included in this summary. Values for Week 4 were adjusted for days on therapy, since steady state drug concentrations were not yet achieved.

Abbreviations: TVF-DP, tenofovir-diphosphate; TDF, tenofovir disoproxil fumarate; FTC, emtricitabine; LLOQ, lower limit of quantitation; BLQ, below the limit of quantitation

Figure S2. Per-protocol Kaplan Meier estimates of incident HIV infection

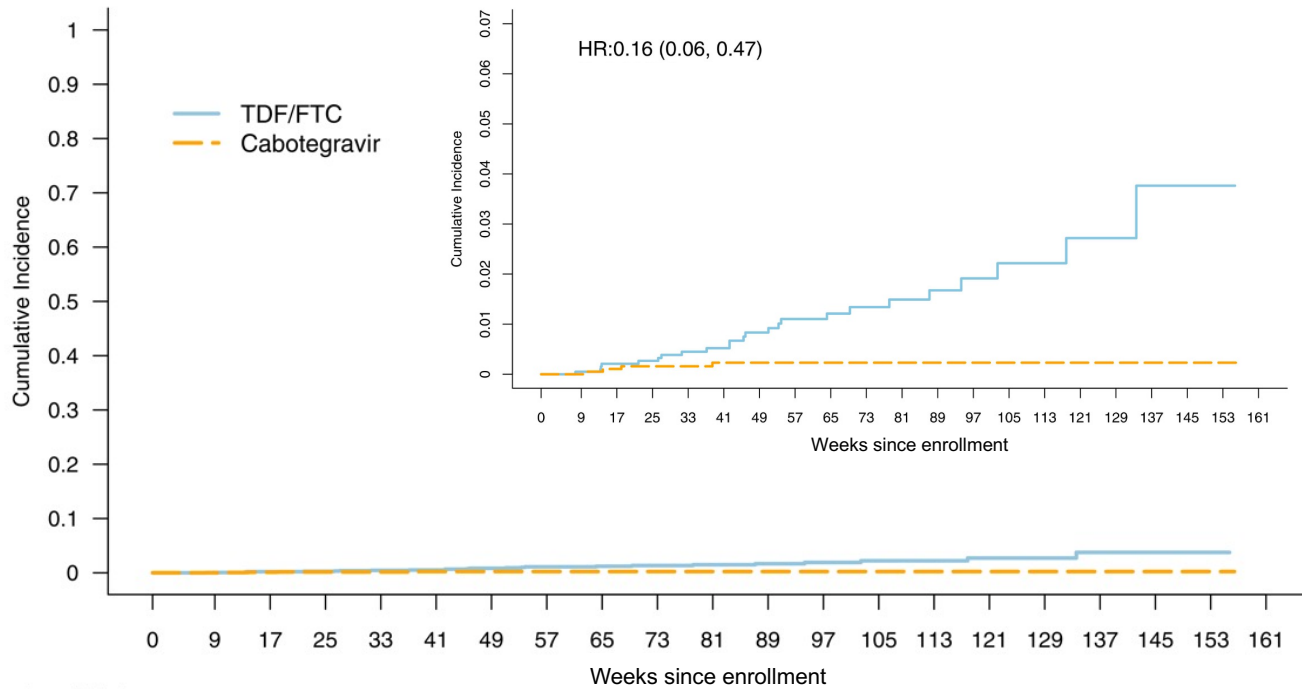

**Number at Risk**

|              |      |      |      |      |      |      |      |      |     |     |     |     |     |     |     |     |     |    |    |    |   |
|--------------|------|------|------|------|------|------|------|------|-----|-----|-----|-----|-----|-----|-----|-----|-----|----|----|----|---|
| TDF/FTC      | 2069 | 2004 | 1855 | 1720 | 1552 | 1364 | 1189 | 1058 | 892 | 748 | 630 | 518 | 398 | 305 | 237 | 182 | 128 | 79 | 49 | 23 | 0 |
| Cabotegravir | 2109 | 2021 | 1853 | 1706 | 1537 | 1366 | 1186 | 1050 | 900 | 770 | 633 | 525 | 406 | 301 | 239 | 175 | 136 | 93 | 64 | 20 | 0 |

**Cumulative Number of Events**

|              |   |   |   |   |   |   |    |    |    |    |    |    |    |    |    |    |    |    |    |    |    |   |
|--------------|---|---|---|---|---|---|----|----|----|----|----|----|----|----|----|----|----|----|----|----|----|---|
| TDF/FTC      | 0 | 1 | 4 | 5 | 8 | 9 | 13 | 16 | 17 | 18 | 19 | 20 | 21 | 22 | 22 | 23 | 23 | 24 | 24 | 24 | 24 | 0 |
| Cabotegravir | 0 | 0 | 2 | 3 | 3 | 4 | 4  | 4  | 4  | 4  | 4  | 4  | 4  | 4  | 4  | 4  | 4  | 4  | 4  | 4  | 4  | 0 |

Inclusion in the per-protocol analysis was defined by on-time receipt of blinded injections/dispensation of oral study product during the injection phase. Only participants who initiated injections of CAB-LA were included, and remained in the analysis provided the next injection was not more than 2 weeks after the protocol-scheduled injection date.

Abbreviations: TDF, tenofovir disoproxil fumarate; FTC, emtricitabine; HR, hazard ratio

Figure S3. Participants with HIV infection in the TDF/FTC arm: TFV concentrations

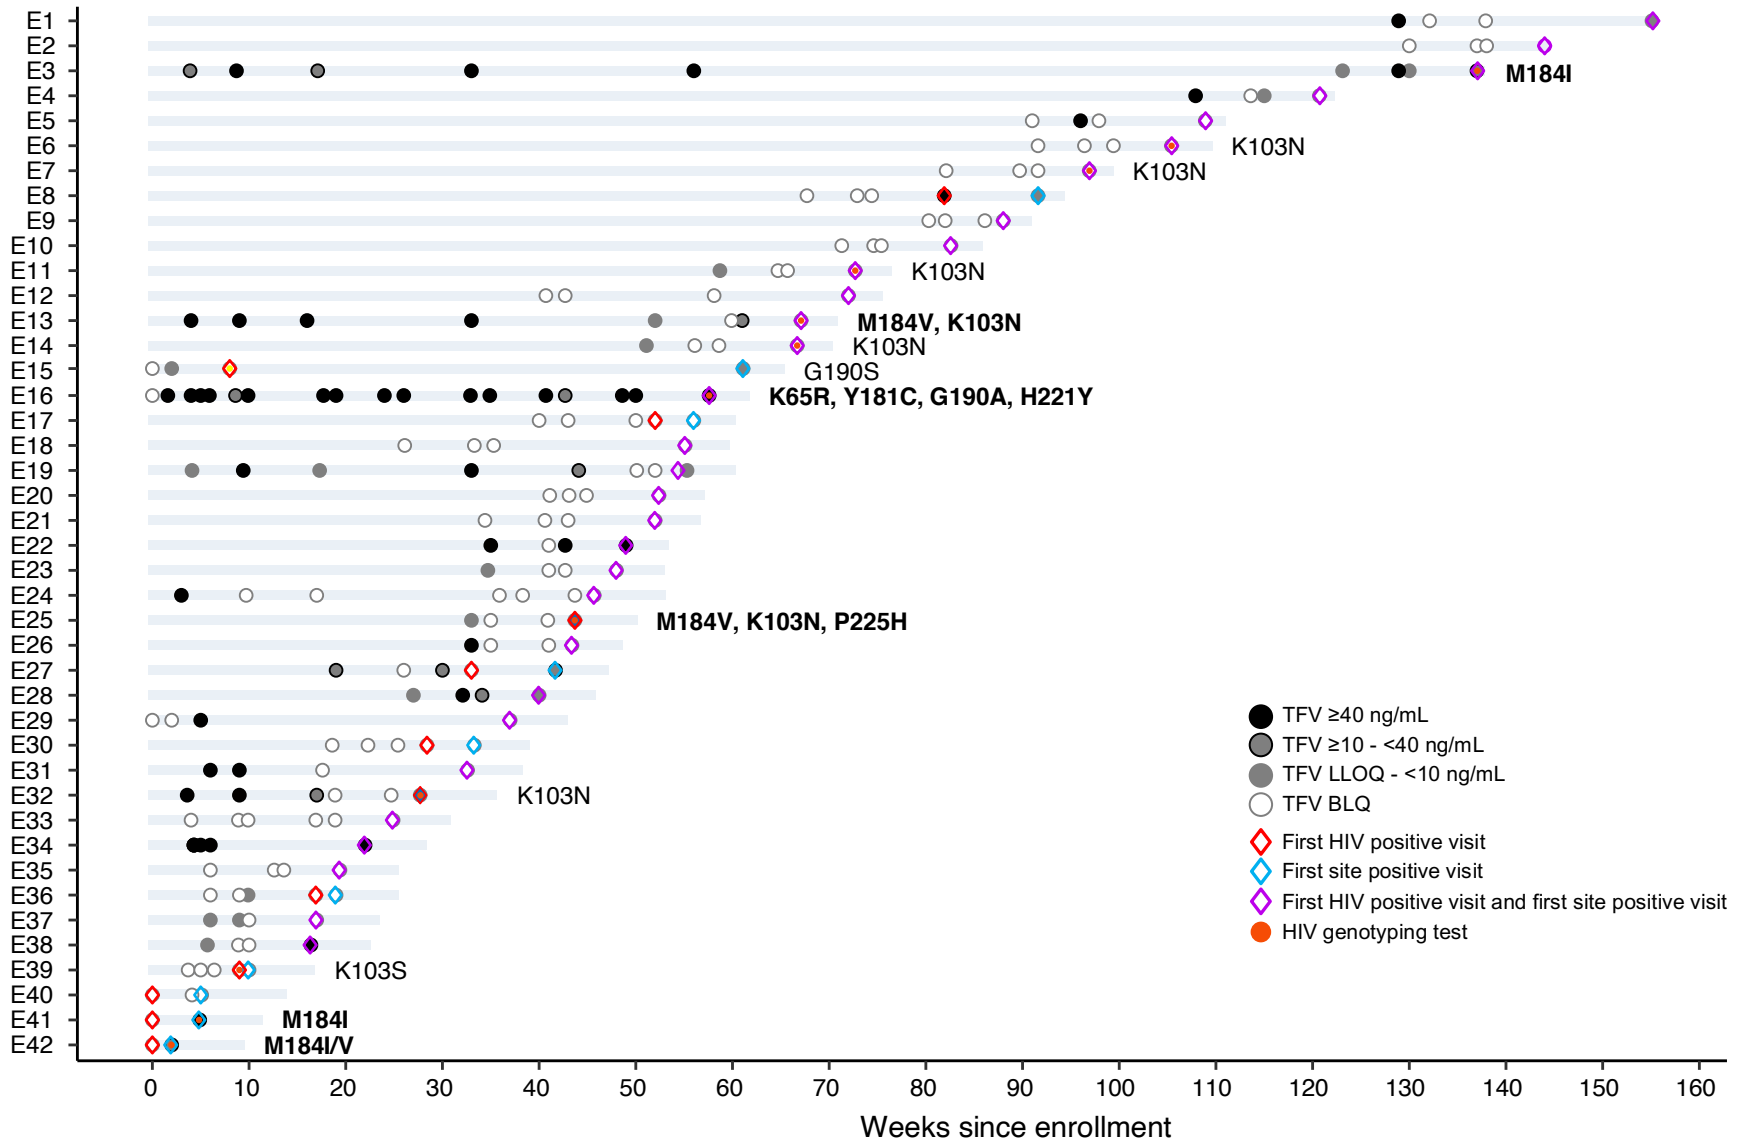

The figures show the timing of key events for participants in the TDF/FTC arm (group E). HIV genotyping results are shown for the first viremic visit (viral load >500 copies/mL). HIV genotyping results are shown to the right of each bar for samples with resistance mutations. These include major mutations that confer resistance to nucleoside/nucleotide reverse transcriptase inhibitors (NRTIs: K65R, M184I/V, M184V) and non-nucleoside reverse transcriptase inhibitors (NNRTIs: K103N, K103S, Y181C, G190A, G190S, H221Y, P225H). Mutations associated with resistance to

TDF/FTC are shown in bold text. Cases without a noted genotype result were WT at first viremic visit, except for E1 and E34 whose genotyping assay failed to amplify.

Abbreviations: TDF, tenofovir disoproxil fumarate; FTC, emtricitabine; TFV, tenofovir; LLOQ, lower limit of quantitation; BLQ, below the limit of quantitation

Figure S4. Participants with HIV infection in the TDF/FTC arm: TFV-DP concentrations

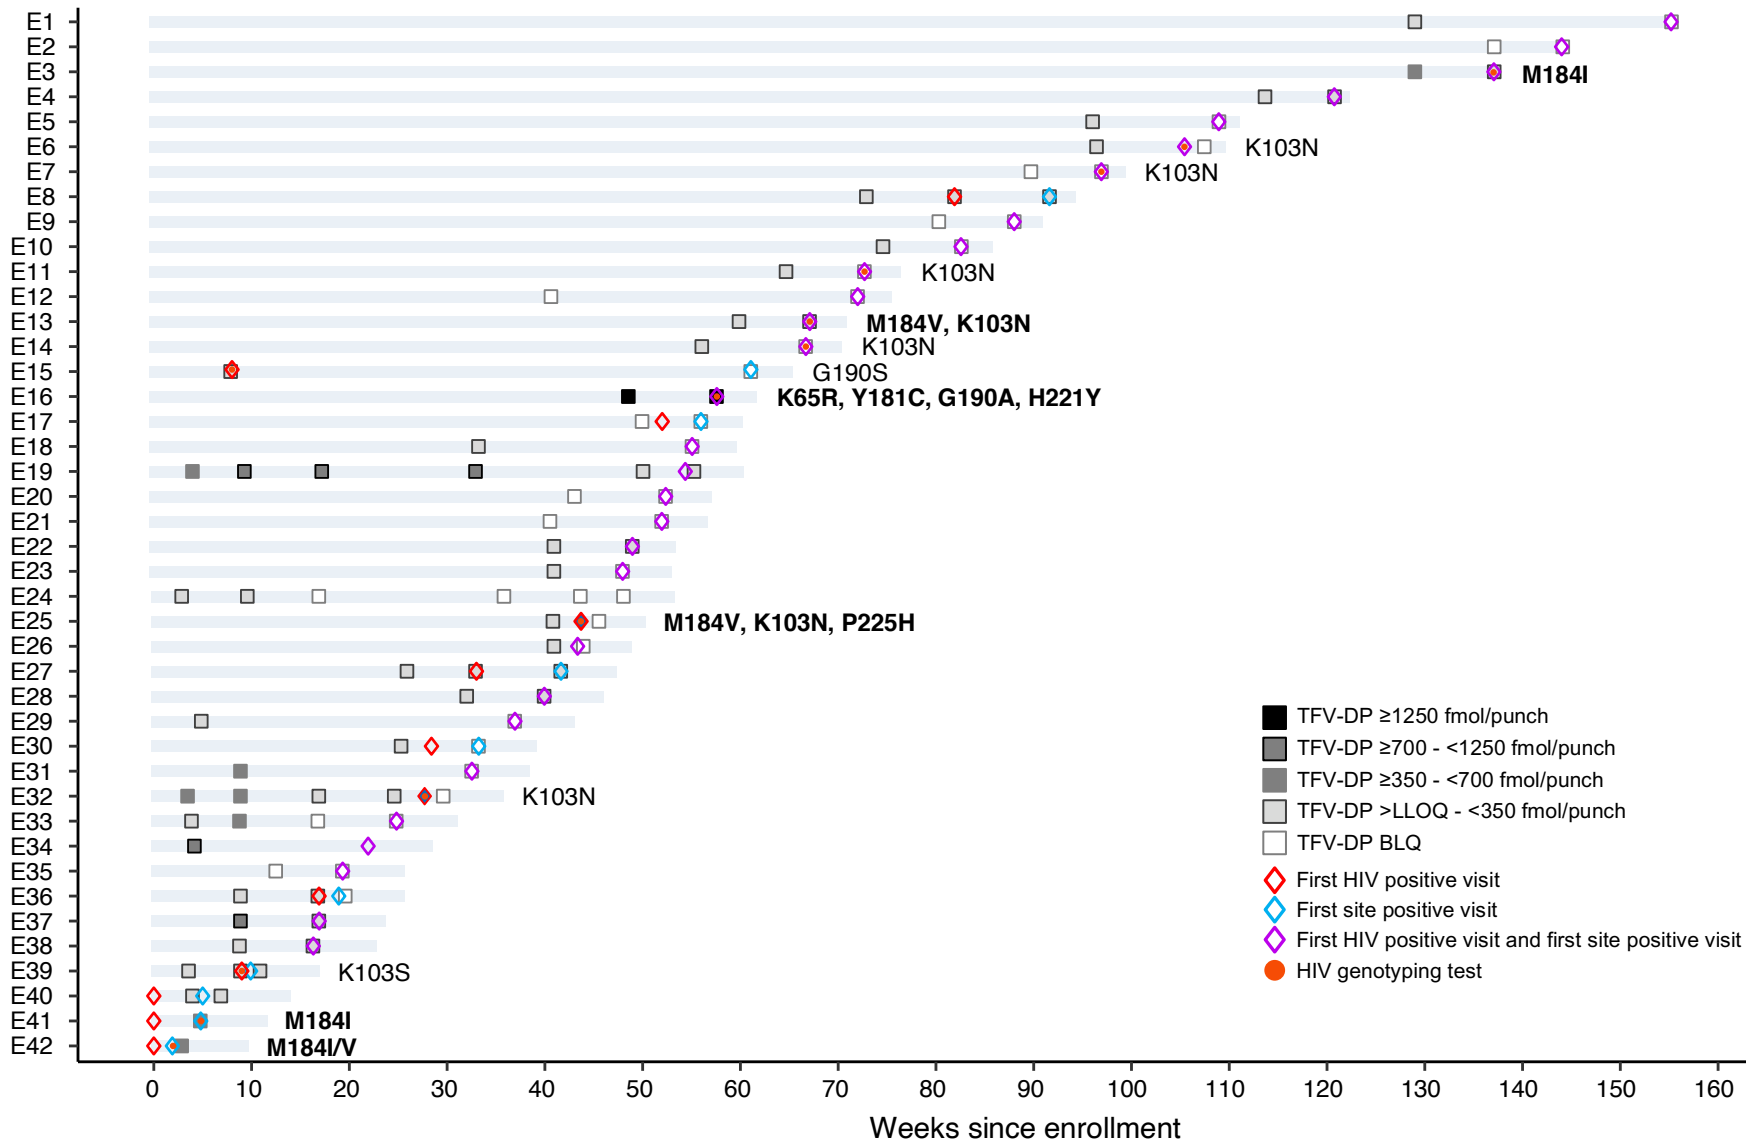

The figures show the timing of key events for participants in the TDF/FTC arm (group E). HIV genotyping results are shown for the first viremic visit (viral load  $> 500$  copies/mL). HIV genotyping results are shown to the right of each bar for samples with resistance mutations. These include major mutations that confer resistance to nucleoside/nucleotide reverse transcriptase inhibitors (NRTIs: K65R, M184I/V, M184V) and non-nucleoside reverse transcriptase inhibitors (NNRTIs: K103N, K103S, Y181C, G190A, G190S, H221Y, P225H). Mutations associated with resistance to TDF/FTC are shown in bold text. Cases without a noted genotype result were WT at first viremic visit, except for E1 and E34 whose genotyping assay failed to amplify.

Abbreviations: TVF-DP, tenofovir-diphosphate; TDF, tenofovir disoproxil fumarate; FTC, emtricitabine; LLOQ, lower limit of quantitation; BLQ, below the limit of quantitation

Figure S5. Injection site reactions over time

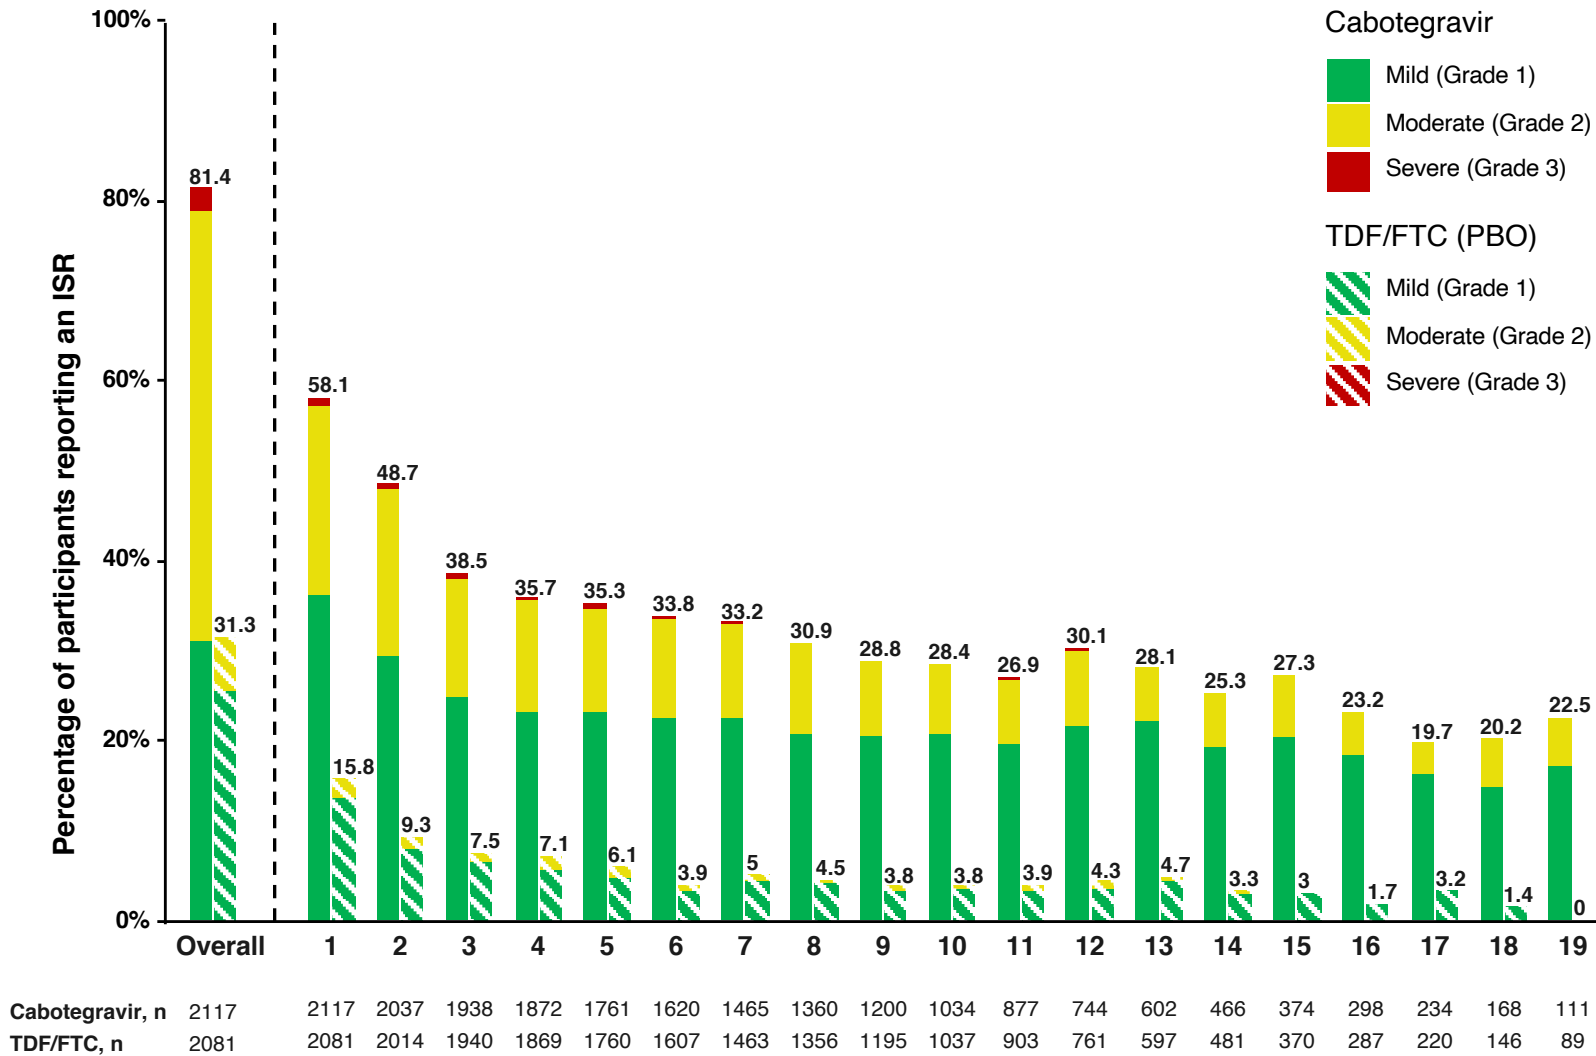

The figure shows the proportion of participants who received at least one injection of blinded study product who reported an injection site reaction. Solid bars represent participants randomized to the cabotegravir arm; hatched bars represent participants randomized to the TDF/FTC arm who

received “placebo” injections composed of a 20% intralipid solution. In each histogram bar, green, yellow and red represent the proportion of reactions that were mild, moderate, and severe, respectively.

Abbreviations: TDF, tenofovir disoproxil fumarate; FTC, emtricitabine

Figure S6. Injection site reactions: timing and duration

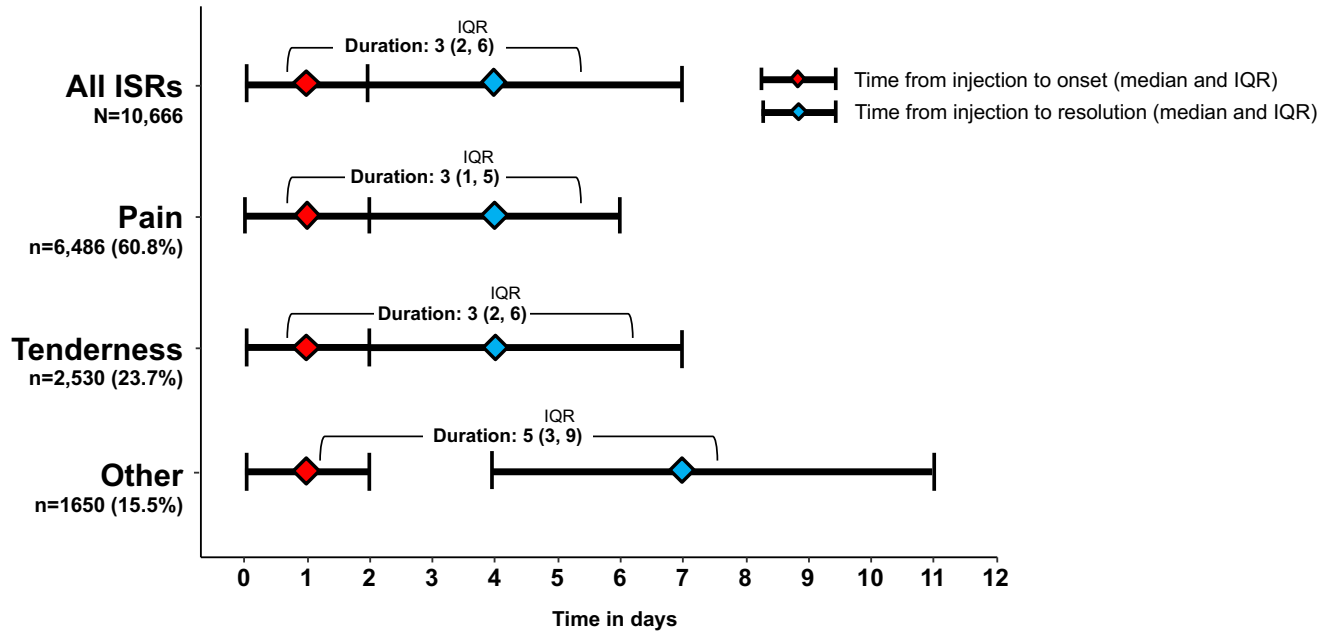

The figure shows the timing of onset of ISRs relative to most proximate study product injection. The red diamond represents median time from injection to symptom onset; the blue diamond represents median time from injection to resolution. Error bars represent the IQRs. “Other” reactions include induration, nodule, hematoma, bruising, discoloration, swelling, erythema, itching, warmth, anesthesia, hemorrhage, and abscess.

Abbreviations: ISR, injection site reaction; IQR, interquartile ratios



Figure S7 Changes in fasting lipids: Total cholesterol

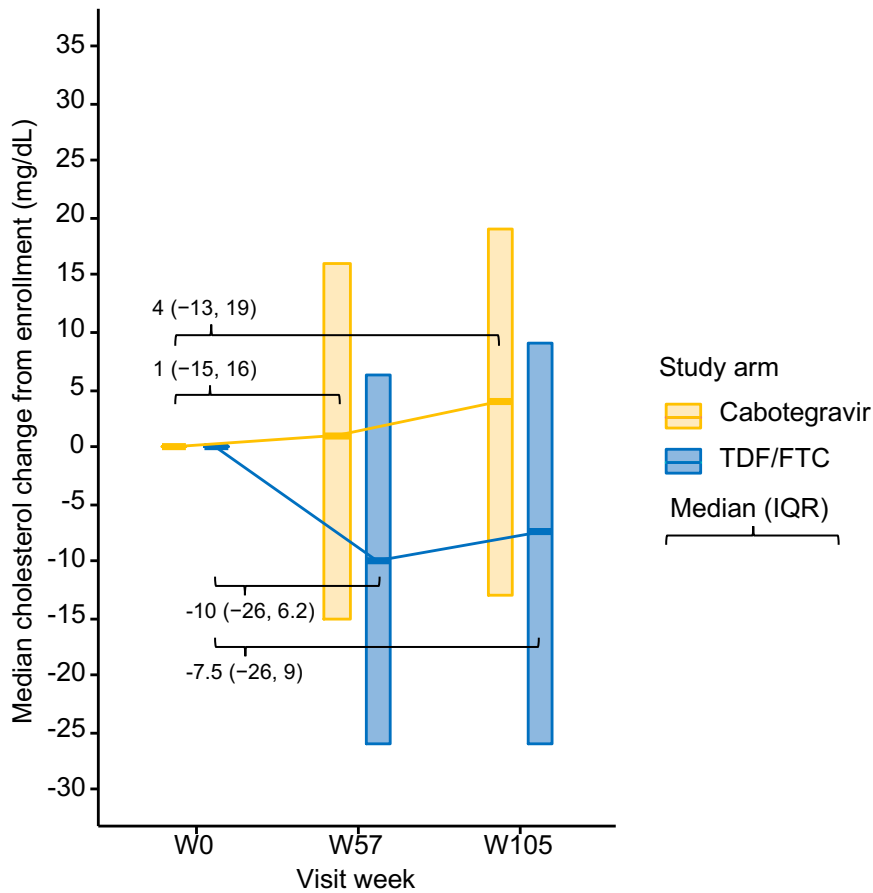

The figure shows median change in fasting total cholesterol from enrollment to Week 57 and Week 105 by study arm. Bars at Week 57 and Week 105 indicate the median (center horizontal line) and interquartile range (IQR, top and bottom of bars). Brackets represent median change (IQR) from baseline for each study arm.

Abbreviations: TDF, tenofovir disoproxil fumarate; FTC: emtricitabine; IQR, interquartile range.

Figure S8. Changes in fasting lipids: Triglycerides

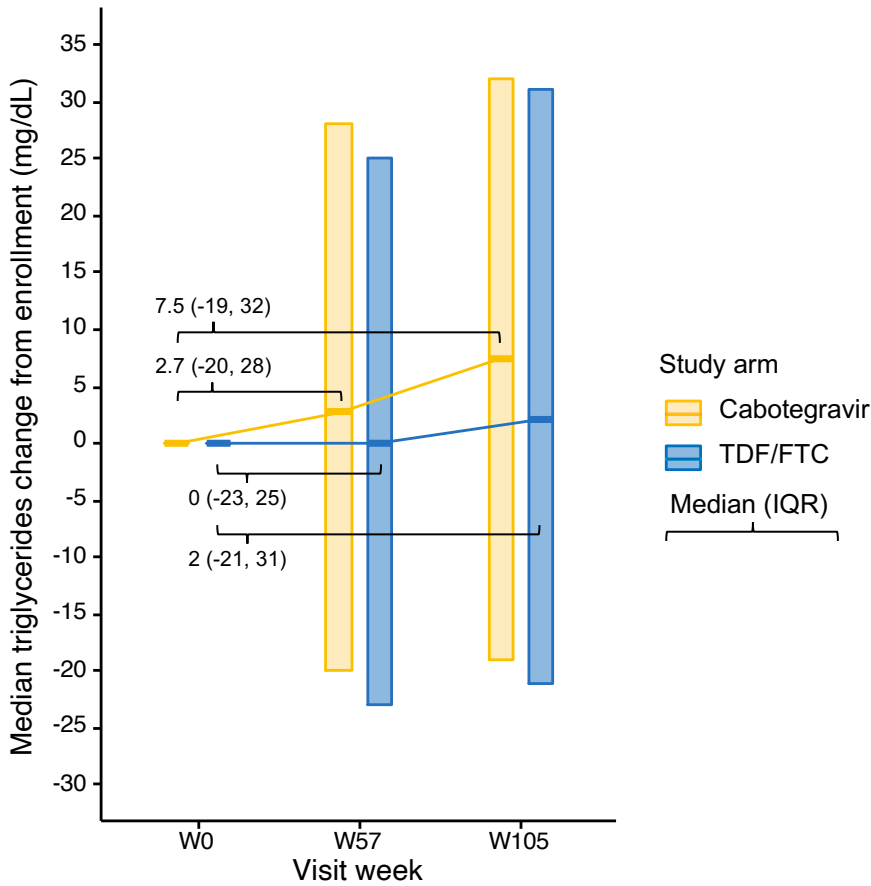

The figure shows median change in fasting triglycerides from enrollment (W0) to Week 57 and Week 105 by study arm. Bars at Week 57 and 105 indicate the median (center horizontal line) and interquartile range (IQR, top and bottom of bars). Brackets represent median change (IQR) from baseline for each study arm.

Abbreviations: TDF, tenofovir disoproxil fumarate; FTC: emtricitabine; IQR, interquartile range.

Figure S9. Changes in fasting lipids: Low density lipoprotein (LDL) cholesterol

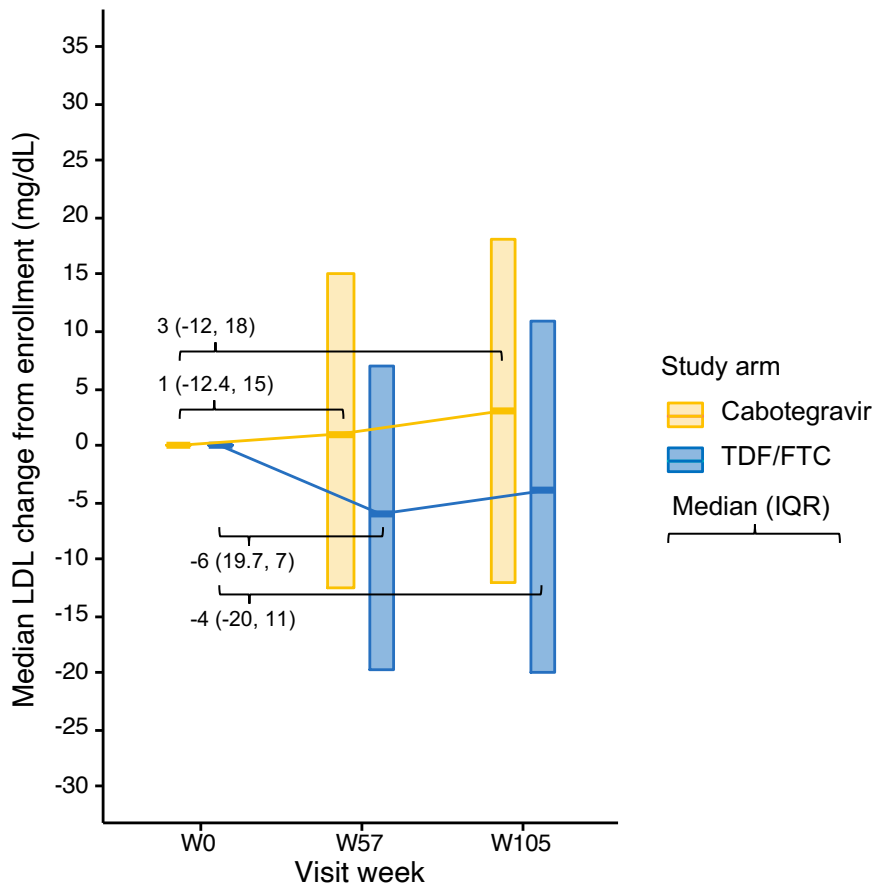

The figure shows median change in fasting low density lipoprotein (LDL) cholesterol from enrollment (W0) to Week 57 and Week 105 by study arm. Bars at Week 57 and 105 indicate the median (center horizontal line) and interquartile range (IQR, top and bottom of bars). Brackets represent median change (IQR) from baseline for each study arm.

Abbreviations: LDL, low density lipoprotein; TDF, tenofovir disoproxil fumarate; FTC: emtricitabine; IQR, interquartile range.

Figure S10. Changes in fasting lipids: High density lipoprotein (HDL) cholesterol

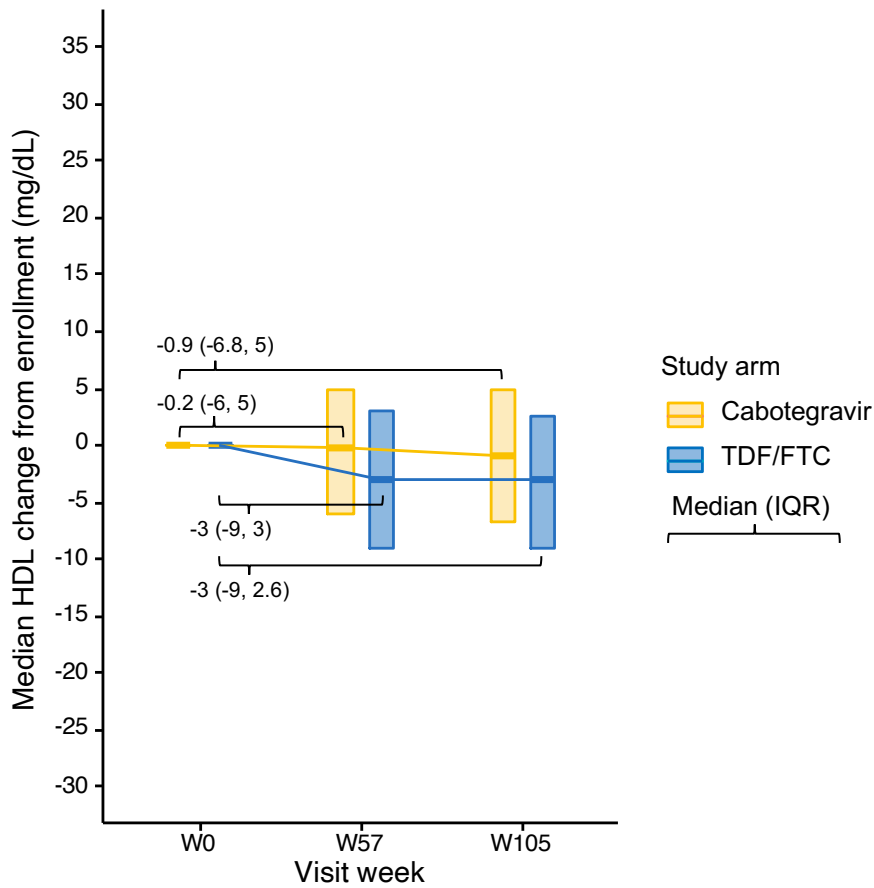

The figure shows median change in fasting HDL cholesterol from enrollment (W0) to Week 57 and Week 105 by study arm. Bars at Week 57 and 105 indicate the median (center horizontal line) and IQR (IQR, top and bottom of bars). Brackets represent median change (IQR) from baseline for each study arm.

Abbreviations: HDL, high density lipoprotein; TDF, tenofovir disoproxil fumarate; FTC: emtricitabine; IQR, interquartile range.

Figure S11. Changes in fasting glucose

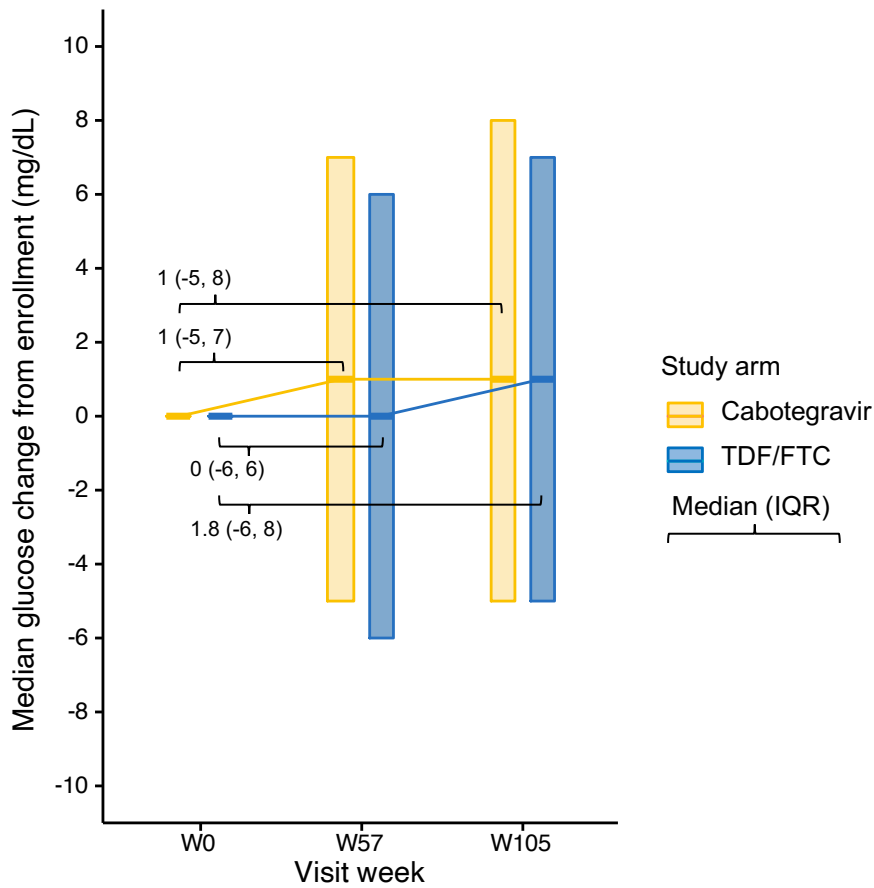

The figure shows median change in fasting glucose from enrollment (W0) to Week 57 and Week 105 by study arm. Bars at Week 57 and 105 indicate the median (center horizontal line) and interquartile range (IQR, top and bottom of bars). Brackets represent median change (IQR) from baseline for each study arm.

Abbreviations: TDF, tenofovir disoproxil fumarate; FTC: emtricitabine; IQR, interquartile range.

Figure S12. Median changes in weight (kg) from baseline (W0) to W105

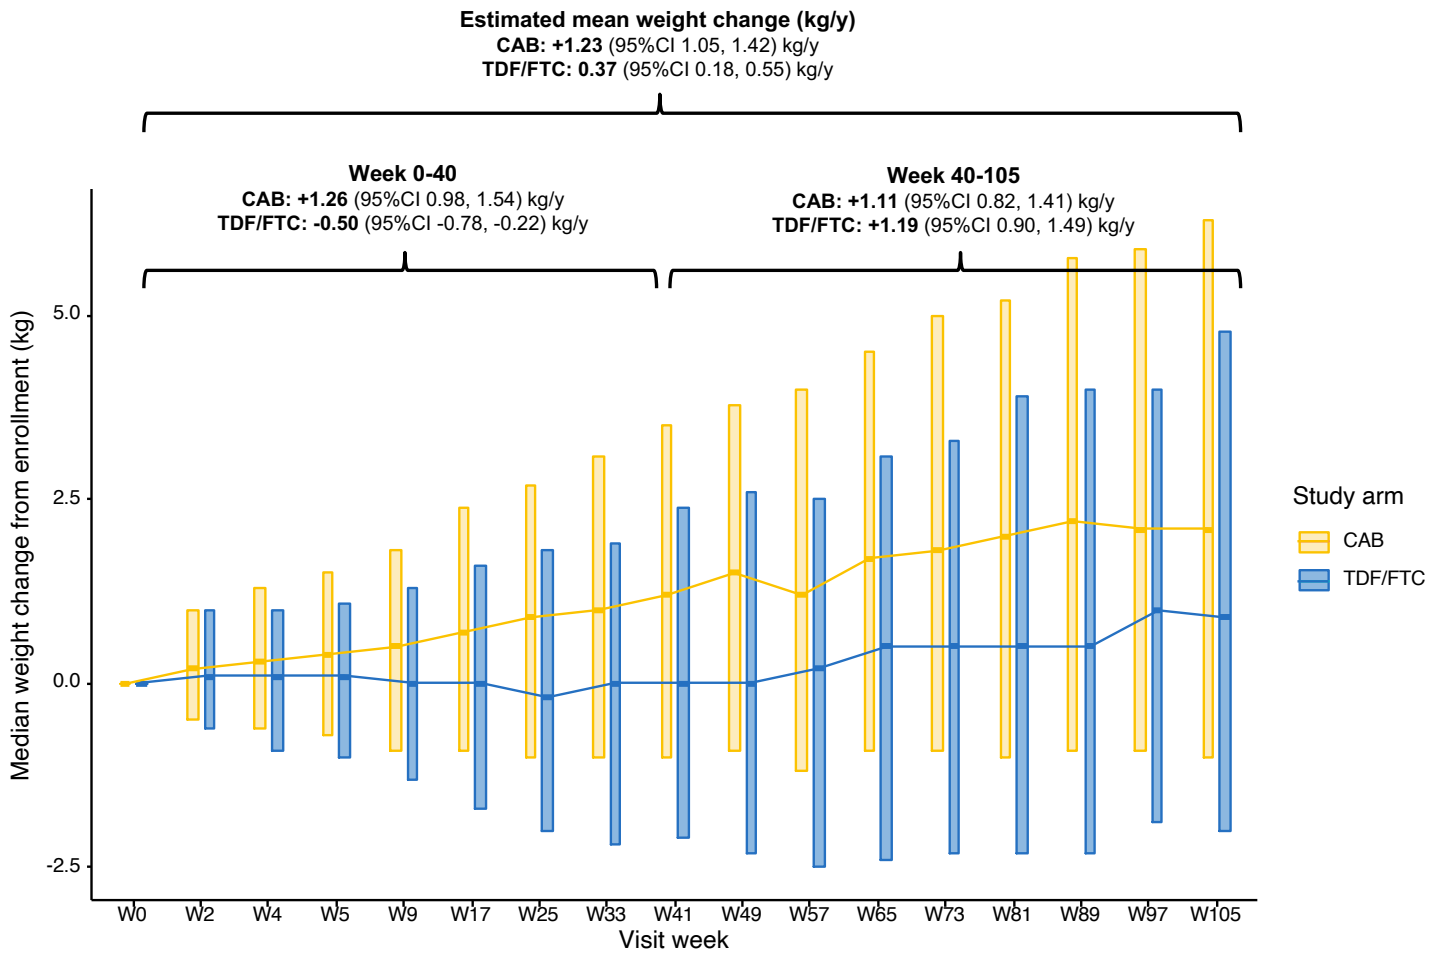

The figure shows median change in weight from enrollment (W0) to Week 105 by study arm. Bars at indicate the median (center horizontal line) and interquartile range (IQR, top and bottom of bars). Linear mixed-effects regression analysis used to determine mean weight change.

Abbreviations: CAB, cabotegravir; TDF, tenofovir disoproxil fumarate; FTC, emtricitabine; IQR, interquartile range.

Table S1. Reasons for permanent study product discontinuation by step and arm

|                                                                                 | Overall<br>(n=4566) | Cabotegravir<br>(n=2282) | TDF/FTC<br>(n=2284) |
|---------------------------------------------------------------------------------|---------------------|--------------------------|---------------------|
| Participants who permanently discontinued study product during steps 1 and 2    | 908<br>(19.9%)      | 445 (19.5%)              | 463<br>(20.3%)      |
| Participants who permanently discontinued study product during step 1           | 318 (7.0%)          | 140 (6.1%)               | 178 (7.8%)          |
| One or more reactive HIV test results or acute HIV infection suspected          | 4 (1.3%)            | 2 (1.4%)                 | 2 (1.1%)            |
| Reported use of prohibited concomitant medication                               | 3 (0.9%)            | 1 (0.7%)                 | 2 (1.1%)            |
| Participant is unwilling or unable to comply with required study procedures     | 150<br>(47.2%)      | 70 (50.0%)               | 80 (44.9%)          |
| Participant is currently using or planning to use PrEP or PEP                   | 1 (0.3%)            | 0 (0.0%)                 | 1 (0.6%)            |
| Low oral adherence*                                                             | 72 (22.6%)          | 26 (18.6%)               | 46 (25.8%)          |
| Clinical AE (protocol mandated)                                                 | 12 (3.8%)           | 8 (5.7%)                 | 4 (2.2%)            |
| Laboratory AE (protocol mandated)                                               | 13 (4.1%)           | 6 (4.3%)                 | 7 (3.9%)            |
| CMC recommendation based on a clinical event                                    | 4 (1.3%)            | 1 (0.7%)                 | 3 (1.7%)            |
| CMC recommendation based on a laboratory value                                  | 7 (2.2%)            | 5 (3.6%)                 | 2 (1.1%)            |
| CMC recommendation based on a psychosocial concern                              | 2 (0.6%)            | 1 (0.7%)                 | 1 (0.6%)            |
| Other                                                                           | 50 (15.7%)          | 20 (14.3%)               | 30 (16.9%)          |
| Participants who permanently discontinued study product during step 2           | 590<br>(12.9%)      | 305 (13.4%)              | 285<br>(12.5%)      |
| Missing product hold form                                                       | 42 (7.1%)           | 20 (6.6%)                | 22 (7.7%)           |
| One or more reactive HIV test results or acute HIV infection suspected          | 55 (9.3%)           | 14 (4.6%)                | 41 (14.4%)          |
| Reported use of prohibited concomitant medication                               | 9 (1.5%)            | 4 (1.3%)                 | 5 (1.8%)            |
| Participant is unwilling or unable to comply with required study procedures     | 197<br>(33.4%)      | 100 (32.8%)              | 97 (34.0%)          |
| Clinical AE (protocol mandated)                                                 | 23 (3.9%)           | 11 (3.6%)                | 12 (4.2%)           |
| Laboratory AE (protocol mandated)                                               | 76 (12.9%)          | 35 (11.5%)               | 41 (14.4%)          |
| Injection site reaction                                                         | 23 (3.9%)           | 23 (7.5%)                | 0 (0.0%)            |
| CMC recommendation based on a clinical event                                    | 6 (1.0%)            | 3 (1.0%)                 | 3 (1.1%)            |
| CMC recommendation based on a laboratory value                                  | 18 (3.1%)           | 10 (3.3%)                | 8 (2.8%)            |
| Participant request for injection intolerance (AE or ISR not protocol mandated) | 27 (4.6%)           | 27 (8.9%)                | 0 (0.0%)            |
| Other                                                                           | 114<br>(19.3%)      | 58 (19.0%)               | 56 (19.6%)          |

\* Defined as <50% of pills taken in step 1

† Includes only adverse events reported by ≥5% of participants in either arm.

Abbreviations: TDF, tenofovir disoproxil fumarate; FTC, emtricitabine; CMC, Clinical Management Committee; HIV, human immunodeficiency virus; AE, adverse event; ISR, injection site reaction

Table S2. Participant Deaths

| No. | Age | Cohort | Arm     | Region        | Visit            | Summary                                 |
|-----|-----|--------|---------|---------------|------------------|-----------------------------------------|
| 1   | 28  | MSM    | TDF/FTC | Africa        | Step 1           | Homicide                                |
| 2   | 45  | MSM    | TDF/FTC | Latin America | Step 2, Week 19  | Homicide (presumed)                     |
| 3   | 26  | MSM    | TDF/FTC | United States | Step 2, Week 35  | Spontaneous intracerebral hemorrhage    |
| 4   | 23  | MSM    | CAB     | Asia          | Step 2, Week 17  | Suspected methamphetamine overdose      |
| 5   | 34  | MSM    | CAB     | Latin America | Step 2, Week 57  | Death due to aspiration of foreign body |
| 6   | 31  | TGW    | CAB     | Latin America | Step 2, Week 17  | Homicide                                |
| 7   | 33  | MSM    | TDF/FTC | Africa        | Step 2, Week 9   | Traumatic pedestrian accident           |
| 8   | 55  | MSM    | TDF/FTC | United States | Step 2, Week 73  | Complications of myocardial infarction  |
| 9   | 53  | MSM    | TDF/FTC | Africa        | Step 3, Week 24  | Homicide                                |
| 10  | 35  | MSM    | TDF/FTC | United States | Step 2, Week 131 | Traumatic pedestrian accident           |
| 11  | 19  | MSM    | CAB     | Latin America | Step 2, Week 55  | Homicide                                |

Abbreviations: No, number; MSM, men who have sex with men; TGW, transgender women; CAB, cabotegravir; TDF, tenofovir disoproxil fumarate; FTC, emtricitabine



Table S3. Study product discontinuation due to injection site reactions (ISRs) - CAB arm

|                            | Number of Participants | Number Discontinued due to ISR | Percentage discontinued due to ISRs | 95% CI         |
|----------------------------|------------------------|--------------------------------|-------------------------------------|----------------|
| Overall                    | 2117                   | 50                             | 2.4%                                | (1.7%, 3.0%)   |
| Maximum grade ISR reported |                        |                                |                                     |                |
| None                       | 393                    | 0                              | 0.0%                                | (0.0%, 0.0%)   |
| Grade 1                    | 715                    | 1                              | 0.1%                                | (-0.1%, 0.4%)  |
| Grade 2                    | 955                    | 26                             | 2.7%                                | (1.7%, 3.8%)   |
| Grade 3                    | 54                     | 23                             | 42.6%                               | (29.4%, 55.8%) |

Abbreviations: CAB, cabotegravir; ISR: CI, confidence intervals

Table S4. Baseline sexually transmitted infections

|                                          | Overall     | Cabotegravir | TDF-FTC     |
|------------------------------------------|-------------|--------------|-------------|
| Enrolled participants*                   | 4566        | 2282         | 2284        |
| Syphilis                                 |             |              |             |
| Tested – no. (%)                         | 4556 (99.8) | 2277 (99.8)  | 2279 (99.8) |
| Diagnosed with active syphilis – no. (%) | 237 (5.2)   | 122 (5.4)    | 115 (5)     |
| Gonorrhea (urine)                        |             |              |             |
| Tested – no. (%)                         | 4561 (99.9) | 2281 (>99.9) | 2280 (99.8) |
| Positive – no. (%)                       | 31 (0.7)    | 13 (0.6)     | 18 (0.8)    |
| Gonorrhea (rectal)                       |             |              |             |
| Tested – no. (%)                         | 4561 (99.9) | 2281 (>99.9) | 2280 (99.8) |
| Positive – no. (%)                       | 298 (6.5)   | 148 (6.5)    | 150 (6.6)   |
| Chlamydia (urine)                        |             |              |             |
| Tested – no. (%)                         | 4561 (99.9) | 2281 (>99.9) | 2280 (99.8) |
| Positive – no. (%)                       | 123 (2.7)   | 66 (2.9)     | 57 (2.5)    |
| Chlamydia (rectal)                       |             |              |             |
| Tested – no. (%)                         | 4561 (99.9) | 2281 (>99.9) | 2280 (99.8) |
| Positive – no. (%)                       | 505 (11.1)  | 248 (10.9)   | 257 (11.3)  |
| Hepatitis B virus                        |             |              |             |
| Tested – no. (%)                         | 4562 (99.9) | 2280 (99.9)  | 2282 (99.9) |
| Non-immune (HBsAb-/HBcAb-)               | 1729 (37.9) | 872 (38.2)   | 857 (37.6)  |
| Vaccine induced immunity (HBsAb+/HBcAb-) | 2304 (50.5) | 1164 (51.1)  | 1140 (50)   |
| Isolated HBcAb+                          | 64 (1.4)    | 29 (1.3)     | 35 (1.5)    |
| Natural immunity (HBsAb+/HBcAb+)         | 422 (9.3)   | 193 (8.5)    | 229 (10)    |
| Other                                    | 43 (0.9)    | 22 (1.0)     | 21 (0.9)    |

\*Inappropriately enrolled participants and participants with invalid identification numbers due to duplicate screening or enrollment are excluded.

Participants with detected hepatitis B surface antigen (HBsAg) at screening were excluded from enrollment. Participants without immunity to hepatitis B Virus were referred for vaccination according to local standards of care.

Abbreviations: TDF, tenofovir disoproxil fumarate; FTC: emtricitabine; HBsAb, hepatitis B surface antibody; HBcAb, hepatitis B core antibody

Table S5. Incident sexually transmitted infections

|                            | Overall | Cabotegravir | TDF-FTC |
|----------------------------|---------|--------------|---------|
| Enrolled participants*     | 4566    | 2282         | 2284    |
| Syphilis                   |         |              |         |
| Person years – no.         | 5531    | 2776         | 2755    |
| Rate per 100 person-years† | 16.7    | 16.6         | 16.7    |
| Gonorrhea (urine)          |         |              |         |
| Person years – no.         | 5464    | 2746         | 2718    |
| Rate per 100 person-years† | 2.45    | 2.77         | 2.13    |
| Gonorrhea (rectal)         |         |              |         |
| Person years – no.         | 5434    | 2725         | 2709    |
| Rate per 100 person-years† | 11      | 11.1         | 11      |
| Chlamydia (urine)          |         |              |         |
| Person years – no.         | 5463    | 2745         | 2718    |
| Rate per 100 person-years† | 4.56    | 4.44         | 4.67    |
| Chlamydia (rectal)         |         |              |         |
| Person years – no.         | 5435    | 2725         | 2710    |
| Rate per 100 person-years† | 16.8    | 15.8         | 17.8    |
| Hepatitis C virus          |         |              |         |
| Person years – no.         | 4105    | 2050         | 2056    |
| Rate per 100 person-years† | 0.54    | 0.49         | 0.58    |

\*Inappropriately enrolled participants and participants with invalid identification numbers due to duplicate screening or enrollment are excluded.

†Person-years are calculated from enrollment to the latest visit with a test result (either positive or negative).

Note: Testing for bacterial sexually transmitted infections was performed every six months after enrollment. This summary also includes STI tests that were not planned but were performed by sites due to suspected infections. For the bacterial STI's, the same participant can be infected more than once. Although we did not assess HBV systematically, there were eight reported cases of acute HBV during the primary analysis period. Three of these cases occurred in participants randomized to the TDF/FTC arm; five occurred participants randomized to the CAB arm.

Abbreviations: no, number; TDF, tenofovir disoproxil fumarate; FTC, emtricitabine; STI, sexually transmitted infection; HBV, Hepatitis B virus; CAB, cabotegravir.

## Supplementary Appendix References

1. Andrews CD, Spreen WR, Mohri H, et al. Long-acting integrase inhibitor protects macaques from intrarectal simian/human immunodeficiency virus. *Science (New York, NY)* 2014;343:1151-4.
2. Andrews CD, Bernard LS, Poon AY, et al. Cabotegravir long acting injection protects macaques against intravenous challenge with SIVmac251. *AIDS (London, England)* 2017;31:461-7.
3. Andrews CD, Yueh YL, Spreen WR, et al. A long-acting integrase inhibitor protects female macaques from repeated high-dose intravaginal SHIV challenge. *Sci Transl Med* 2015;7:270ra4.
4. Radzio J, Spreen W, Yueh YL, et al. The long-acting integrase inhibitor GSK744 protects macaques from repeated intravaginal SHIV challenge. *Sci Transl Med* 2015;7:270ra5.
5. Dobard C, Makarova N, Nishiura K, et al. Long-Acting Cabotegravir Protects Macaques Against Repeated Penile Simian-Human Immunodeficiency Virus Exposures. *J Infect Dis* 2020;222:391-5.
6. Margolis DA, Gonzalez-Garcia J, Stellbrink H-J, et al. Long-acting intramuscular cabotegravir and rilpivirine in adults with HIV-1 infection (LATTE-2): 96-week results of a randomised, open-label, phase 2b, non-inferiority trial. *The Lancet* 2017;390:1499-510.
7. Swindells S, Andrade-Villanueva J-F, Richmond GJ, et al. Long-acting cabotegravir and rilpivirine for maintenance of HIV-1 suppression. *New England Journal of Medicine* 2020;382:1112-23.
8. Orkin C, Arasteh K, Górgolas Hernández-Mora M, et al. Long-acting cabotegravir and rilpivirine after oral induction for HIV-1 infection. *New England Journal of Medicine* 2020;382:1124-35.
9. Radzio-Basu J, Council O, Cong M-e, et al. Drug resistance emergence in macaques administered cabotegravir long-acting for pre-exposure prophylaxis during acute SHIV infection. *Nature communications* 2019;10:1-8.
10. Landovitz RJ, Zangeneh SZ, Chau G, et al. Cabotegravir is not associated with weight gain in human immunodeficiency virus-uninfected individuals in HPTN 077. *Clinical Infectious Diseases* 2020;70:319-22.
11. Mayer KH, Molina J-M, Thompson MA, et al. Emtricitabine and tenofovir alafenamide vs emtricitabine and tenofovir disoproxil fumarate for HIV pre-exposure prophylaxis (DISCOVER): primary results from a randomised, double-blind, multicentre, active-controlled, phase 3, non-inferiority trial. *The Lancet* 2020;396:239-54.
12. Marzinke MA, Grinsztejn B, Fogel JM, et al. Characterization of HIV infection in cisgender men and transgender women who have sex with men receiving injectable cabotegravir for HIV prevention: HPTN 083. *Journal of Infectious Diseases*. In Press.
13. Safren SA, Otto MW, Worth JL. Life-steps: Applying cognitive behavioral therapy to HIV medication adherence. *Cognitive and Behavioral Practice* 1999;6:332-41.
14. Safren SA, Otto MW, Worth JL, et al. Two strategies to increase adherence to HIV antiretroviral medication: life-steps and medication monitoring. *Behaviour research and therapy* 2001;39:1151-62.
15. Biello KB, Psaros C, Krakower DS, et al. A Pre-Exposure Prophylaxis Adherence Intervention (LifeSteps) for Young Men Who Have Sex With Men: Protocol for a Pilot Randomized Controlled Trial. *JMIR Res Protoc* 2019;8:e10661-e.
16. Psaros C, Haberer JE, Katabira E, et al. An intervention to support HIV preexposure prophylaxis adherence in HIV-serodiscordant couples in Uganda. *Journal of acquired immune deficiency syndromes (1999)* 2014;66:522-9.
17. Mayer KH, Safren SA, Elsesser SA, et al. Optimizing Pre-Exposure Antiretroviral Prophylaxis Adherence in Men Who Have Sex with Men: Results of a Pilot Randomized Controlled Trial of "Life-Steps for PrEP". *AIDS Behav* 2016.
18. Nezu AM, D'Zurilla TJ. *Problem-solving therapy: A positive approach to clinical intervention*: Springer Publishing Company; 2006.
19. Psaros C, Mayer K, Mimiaga M, et al. Life-Steps for PrEP. [Available from author, Steven A. Safren]2020.

20. Centers for Disease Control and Prevention. Compendium of evidence-based interventions and best practices for HIV prevention. Compendium of evidence-based interventions and best practices for HIV prevention. Atlanta, GA2020.
21. Mullick C, Murray J. Correlations Between Human Immunodeficiency Virus (HIV) Infection and Rectal Gonorrhoea Incidence in Men Who Have Sex With Men: Implications for Future HIV Preexposure Prophylaxis Trials. *J Infect Dis* 2020;221:214-7.
22. Donnell D, Zewdie K, Ratna N, et al. For MSM attending sexual health clinics in England, rates of new HIV infections decreased and rates of new rectal GC diagnosis increased between 2010 and 2018. *Journal of the International Aids Society* 2021;24.
23. Venter WDF, Moorhouse M, Sokhela S, et al. Dolutegravir plus Two Different Prodrugs of Tenofovir to Treat HIV. *New England Journal of Medicine* 2019;381:803-15.
